# Supplementary material
Source: ML conference proceedings conference paper supplement (https://openreview.net/forum?id=gCSEQIgbWH)
Supplement: supplementary_material [file attachment]

## Sheet: Sheet1
init_node	term_node
1	3
3	1
1	7
7	1
1	9
9	1
2	3
3	2
3	6
6	3
3	7
7	3
4	6
6	4
4	8
8	4
5	10
10	5
5	11
11	5
6	8
8	6
6	13
13	6
6	17
17	6
7	9
9	7
7	13
13	7
8	11
11	8
8	16
16	8
9	12
12	9
9	13
13	9
10	11
11	10
10	18
18	10
10	20
20	10
11	19
19	11
13	14
14	13
13	15
15	13
14	17
17	14
14	22
22	14
16	17
17	16
16	19
19	16
16	22
22	16
17	22
22	17
18	19
19	18
18	21
21	18
19	22
22	19
20	21
21	20
20	30
30	20
20	58
58	20
21	22
22	21
21	23
23	21
22	23
23	22
22	25
25	22
22	28
28	22
22	29
29	22
22	40
40	22
23	24
24	23
23	31
31	23
24	25
25	24
24	26
26	24
24	33
33	24
25	26
26	25
26	27
27	26
26	28
28	26
27	28
28	27
27	33
33	27
27	35
35	27
28	37
37	28
29	41
41	29
29	49
49	29
30	31
31	30
30	60
60	30
31	32
32	31
31	60
60	31
32	33
33	32
32	34
34	32
32	60
60	32
33	34
34	33
34	35
35	34
34	60
60	34
35	36
36	35
35	71
71	35
36	43
43	36
36	44
44	36
36	71
71	36
37	38
38	37
37	42
42	37
38	39
39	38
38	42
42	38
39	40
40	39
39	48
48	39
40	41
41	40
40	48
48	40
41	49
49	41
42	43
43	42
42	45
45	42
43	44
44	43
43	45
45	43
44	46
46	44
44	54
54	44
45	46
46	45
45	47
47	45
46	47
47	46
46	54
54	46
47	48
48	47
47	74
74	47
48	49
49	48
48	51
51	48
48	52
52	48
48	53
53	48
48	54
54	48
48	74
74	48
49	50
50	49
49	73
73	49
50	51
51	50
50	73
73	50
51	52
52	51
52	53
53	52
53	54
54	53
55	57
57	55
56	57
57	56
57	58
58	57
57	59
59	57
58	59
59	58
59	60
60	59
59	72
72	59
60	61
61	60
60	63
63	60
60	65
65	60
60	67
67	60
60	69
69	60
60	71
71	60
60	72
72	60
62	63
63	62
63	65
65	63
64	65
65	64
65	66
66	65
67	68
68	67
67	69
69	67
69	70
70	69
69	71
71	69
