# Supplementary material
Source: ML conference proceedings conference paper supplement (https://openreview.net/forum?id=gCSEQIgbWH)

Number of Nodes: 36, Greedy/Qtable

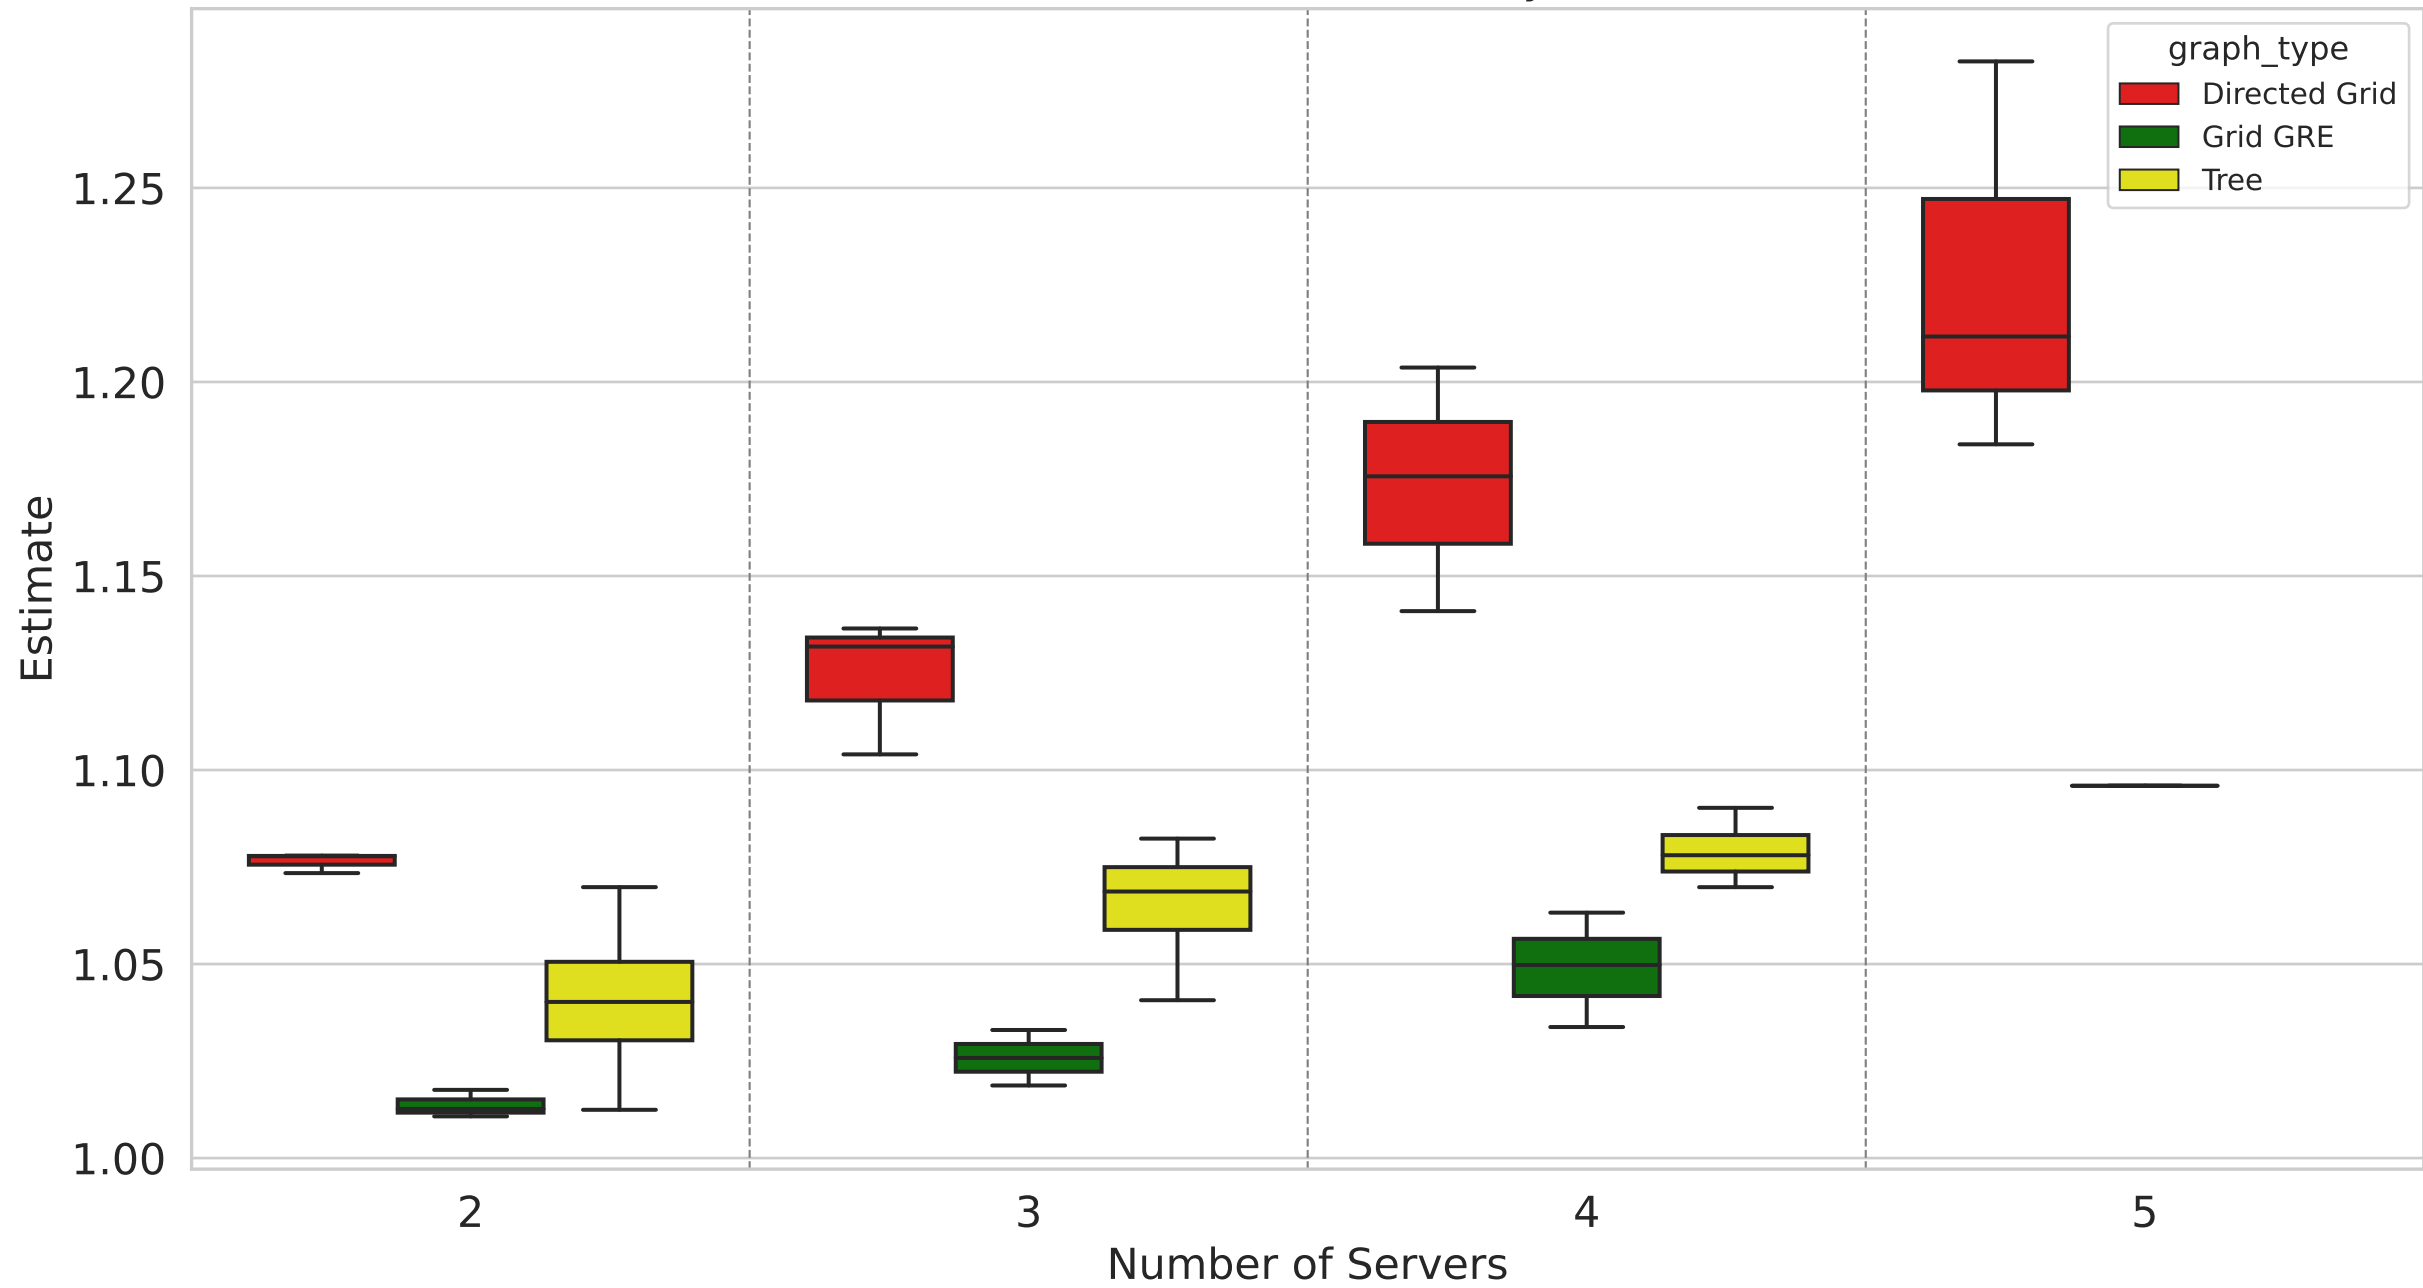

Supplement: supplementary_material [file attachment]

Number of Nodes: 16, Greedy/Qtable

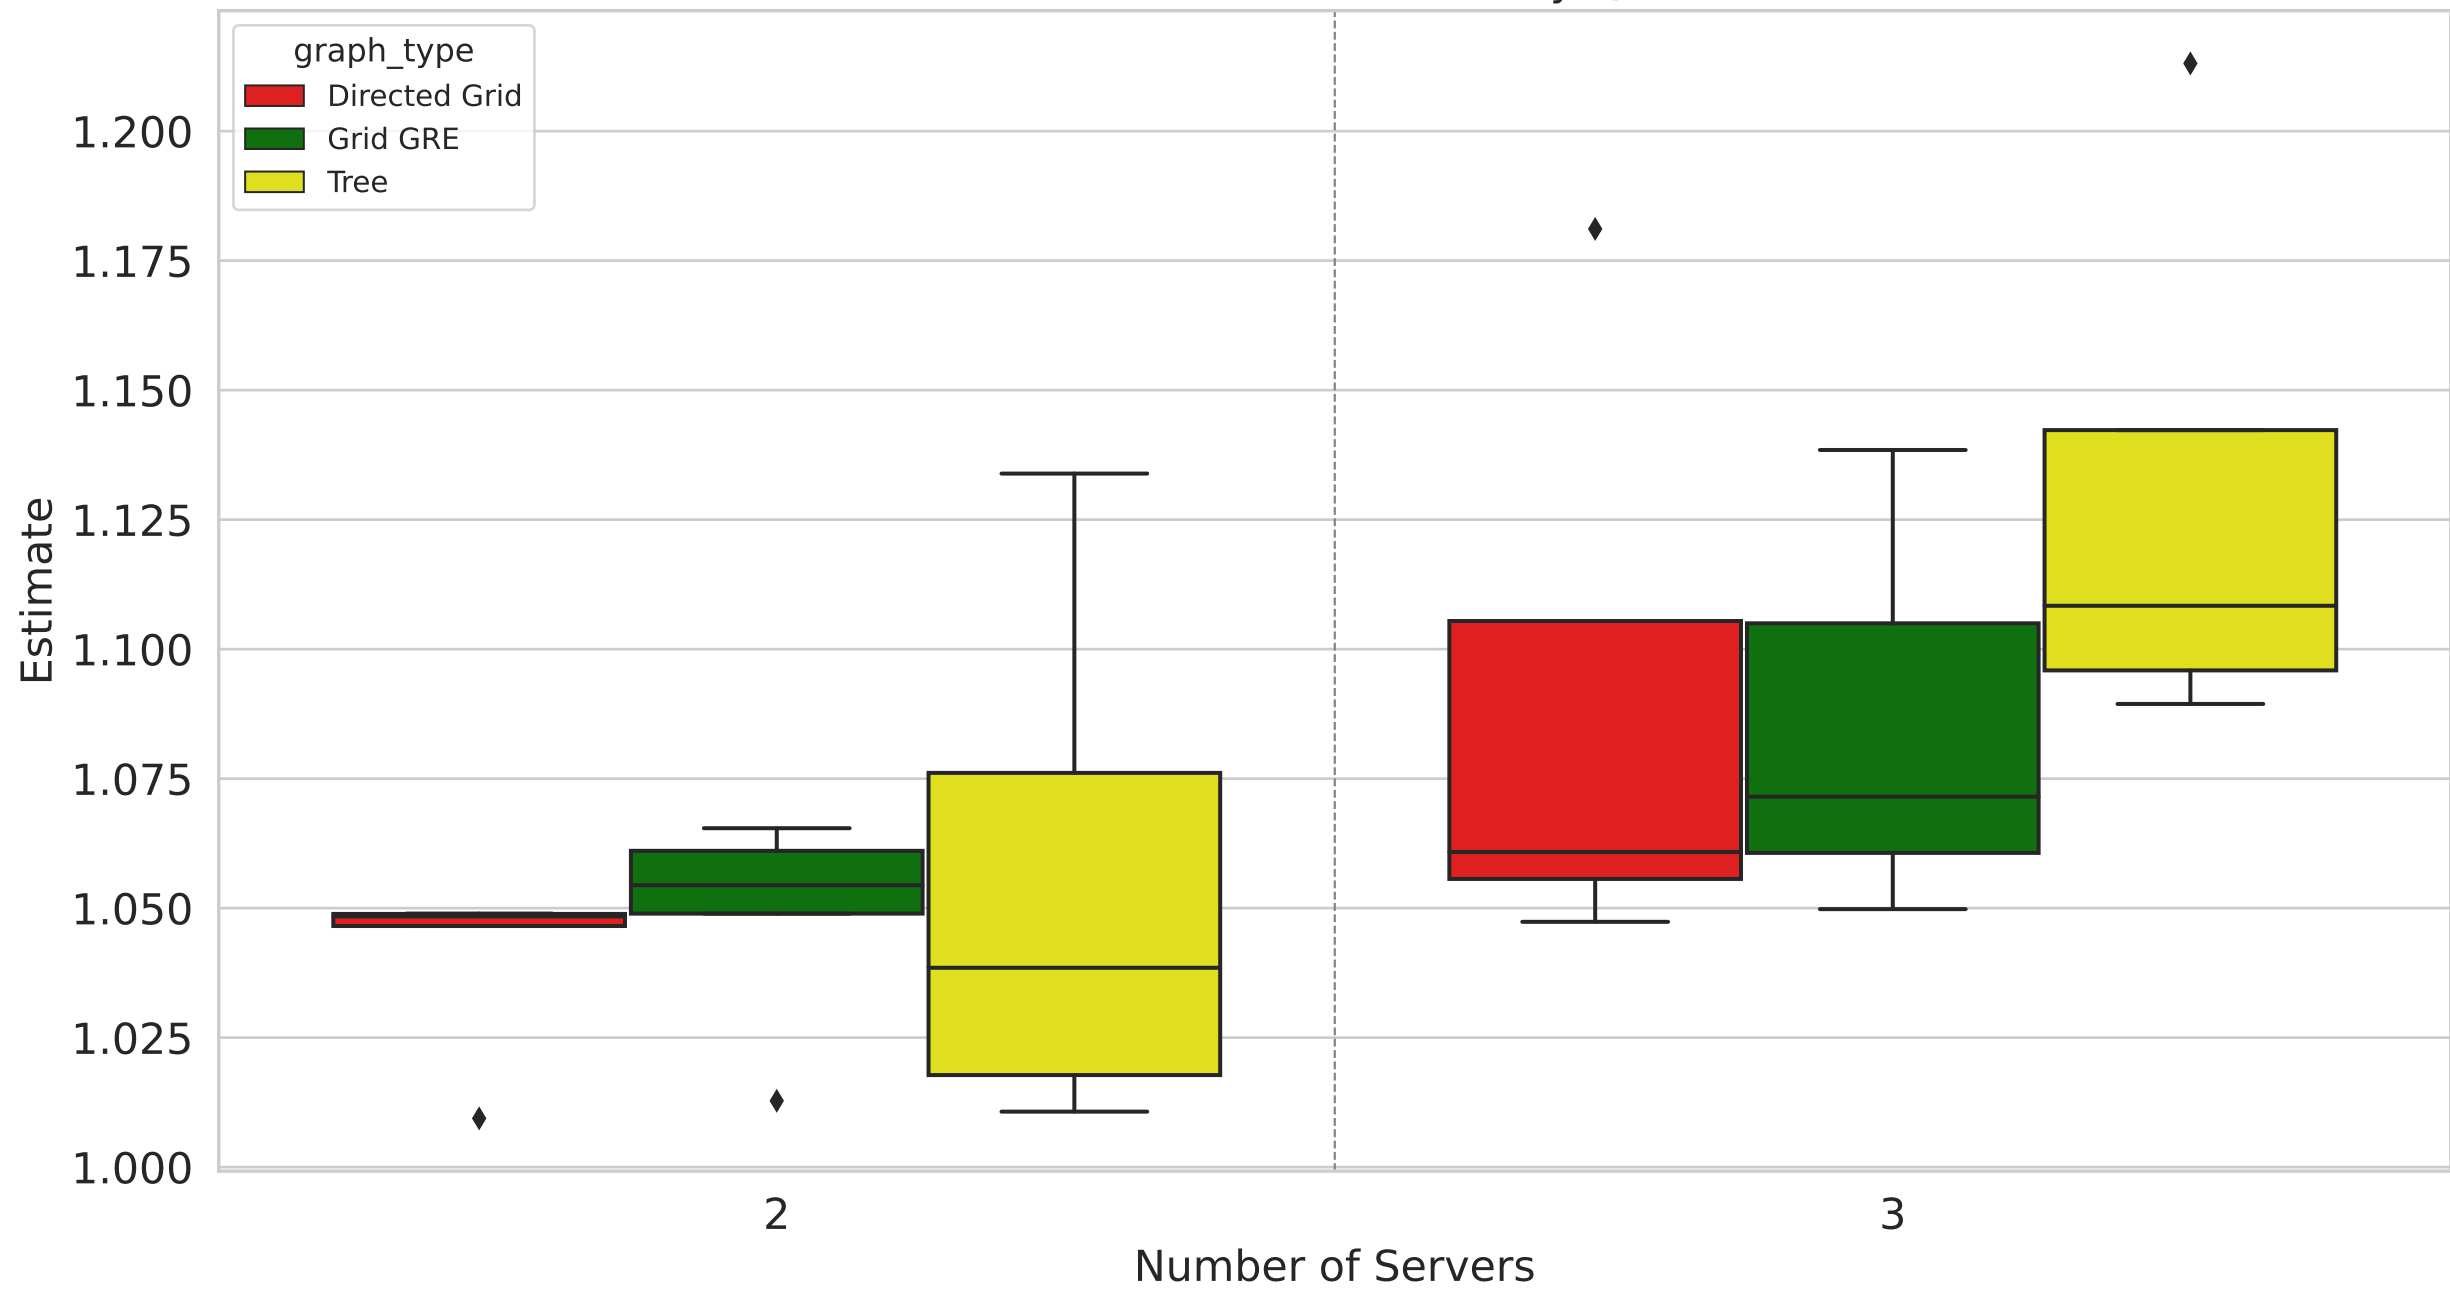

Supplement: supplementary_material [file attachment]

Training Curve for Random Tree with 36 Nodes

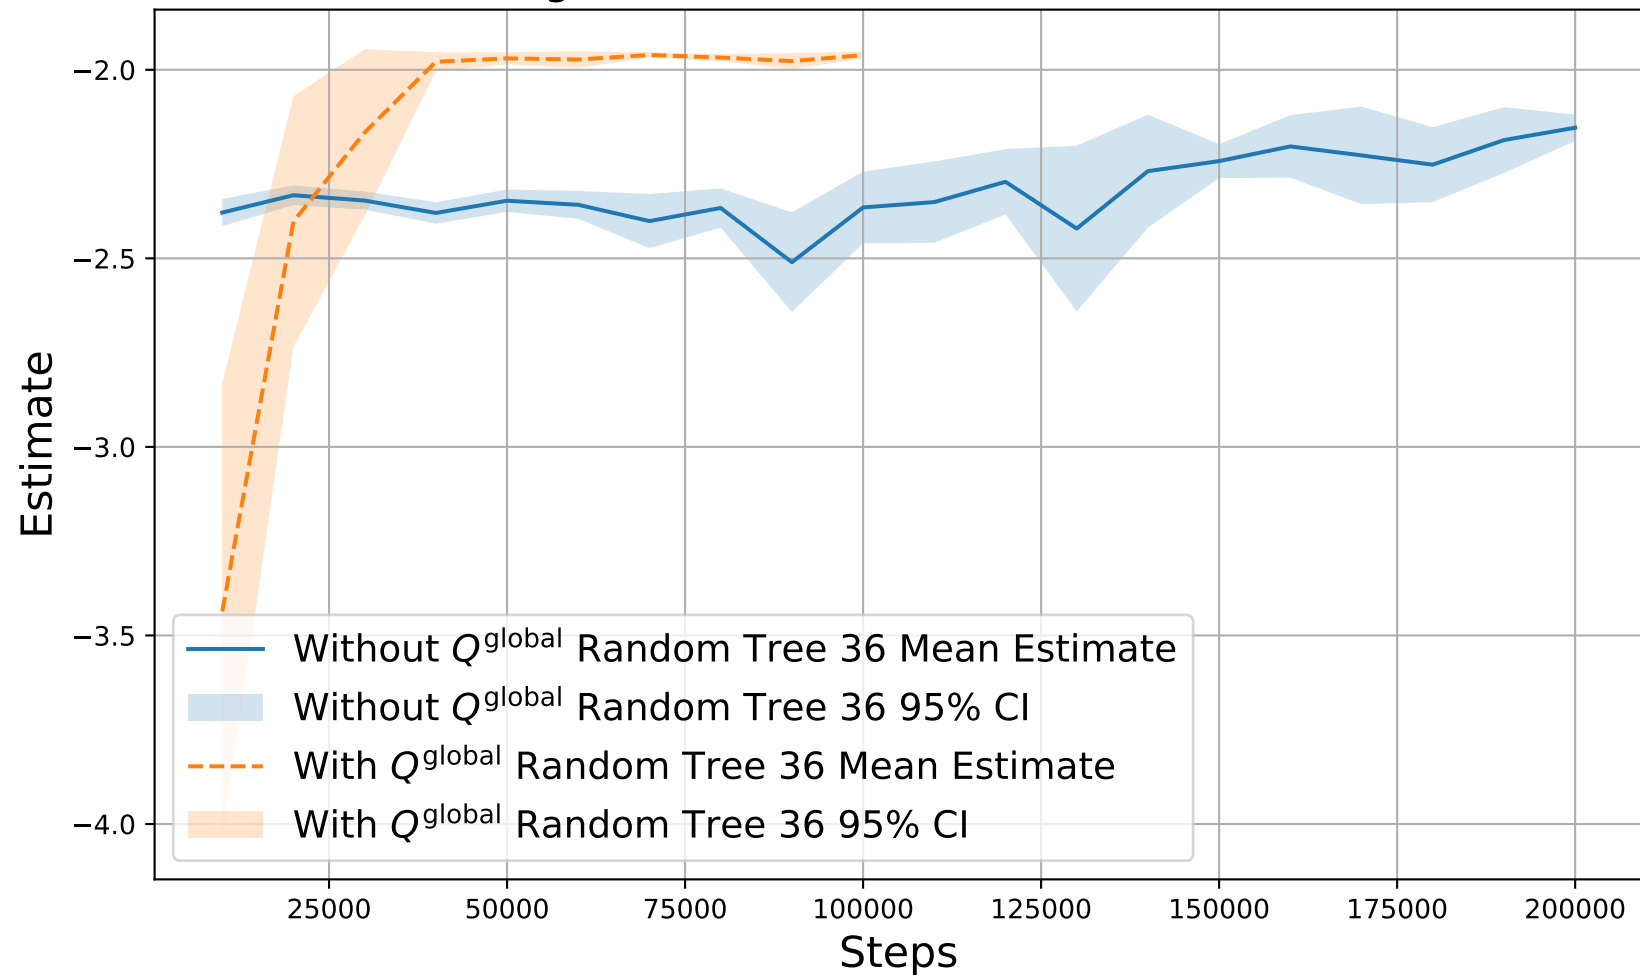

Supplement: supplementary_material [file attachment]

Grid, Number of Nodes: 9

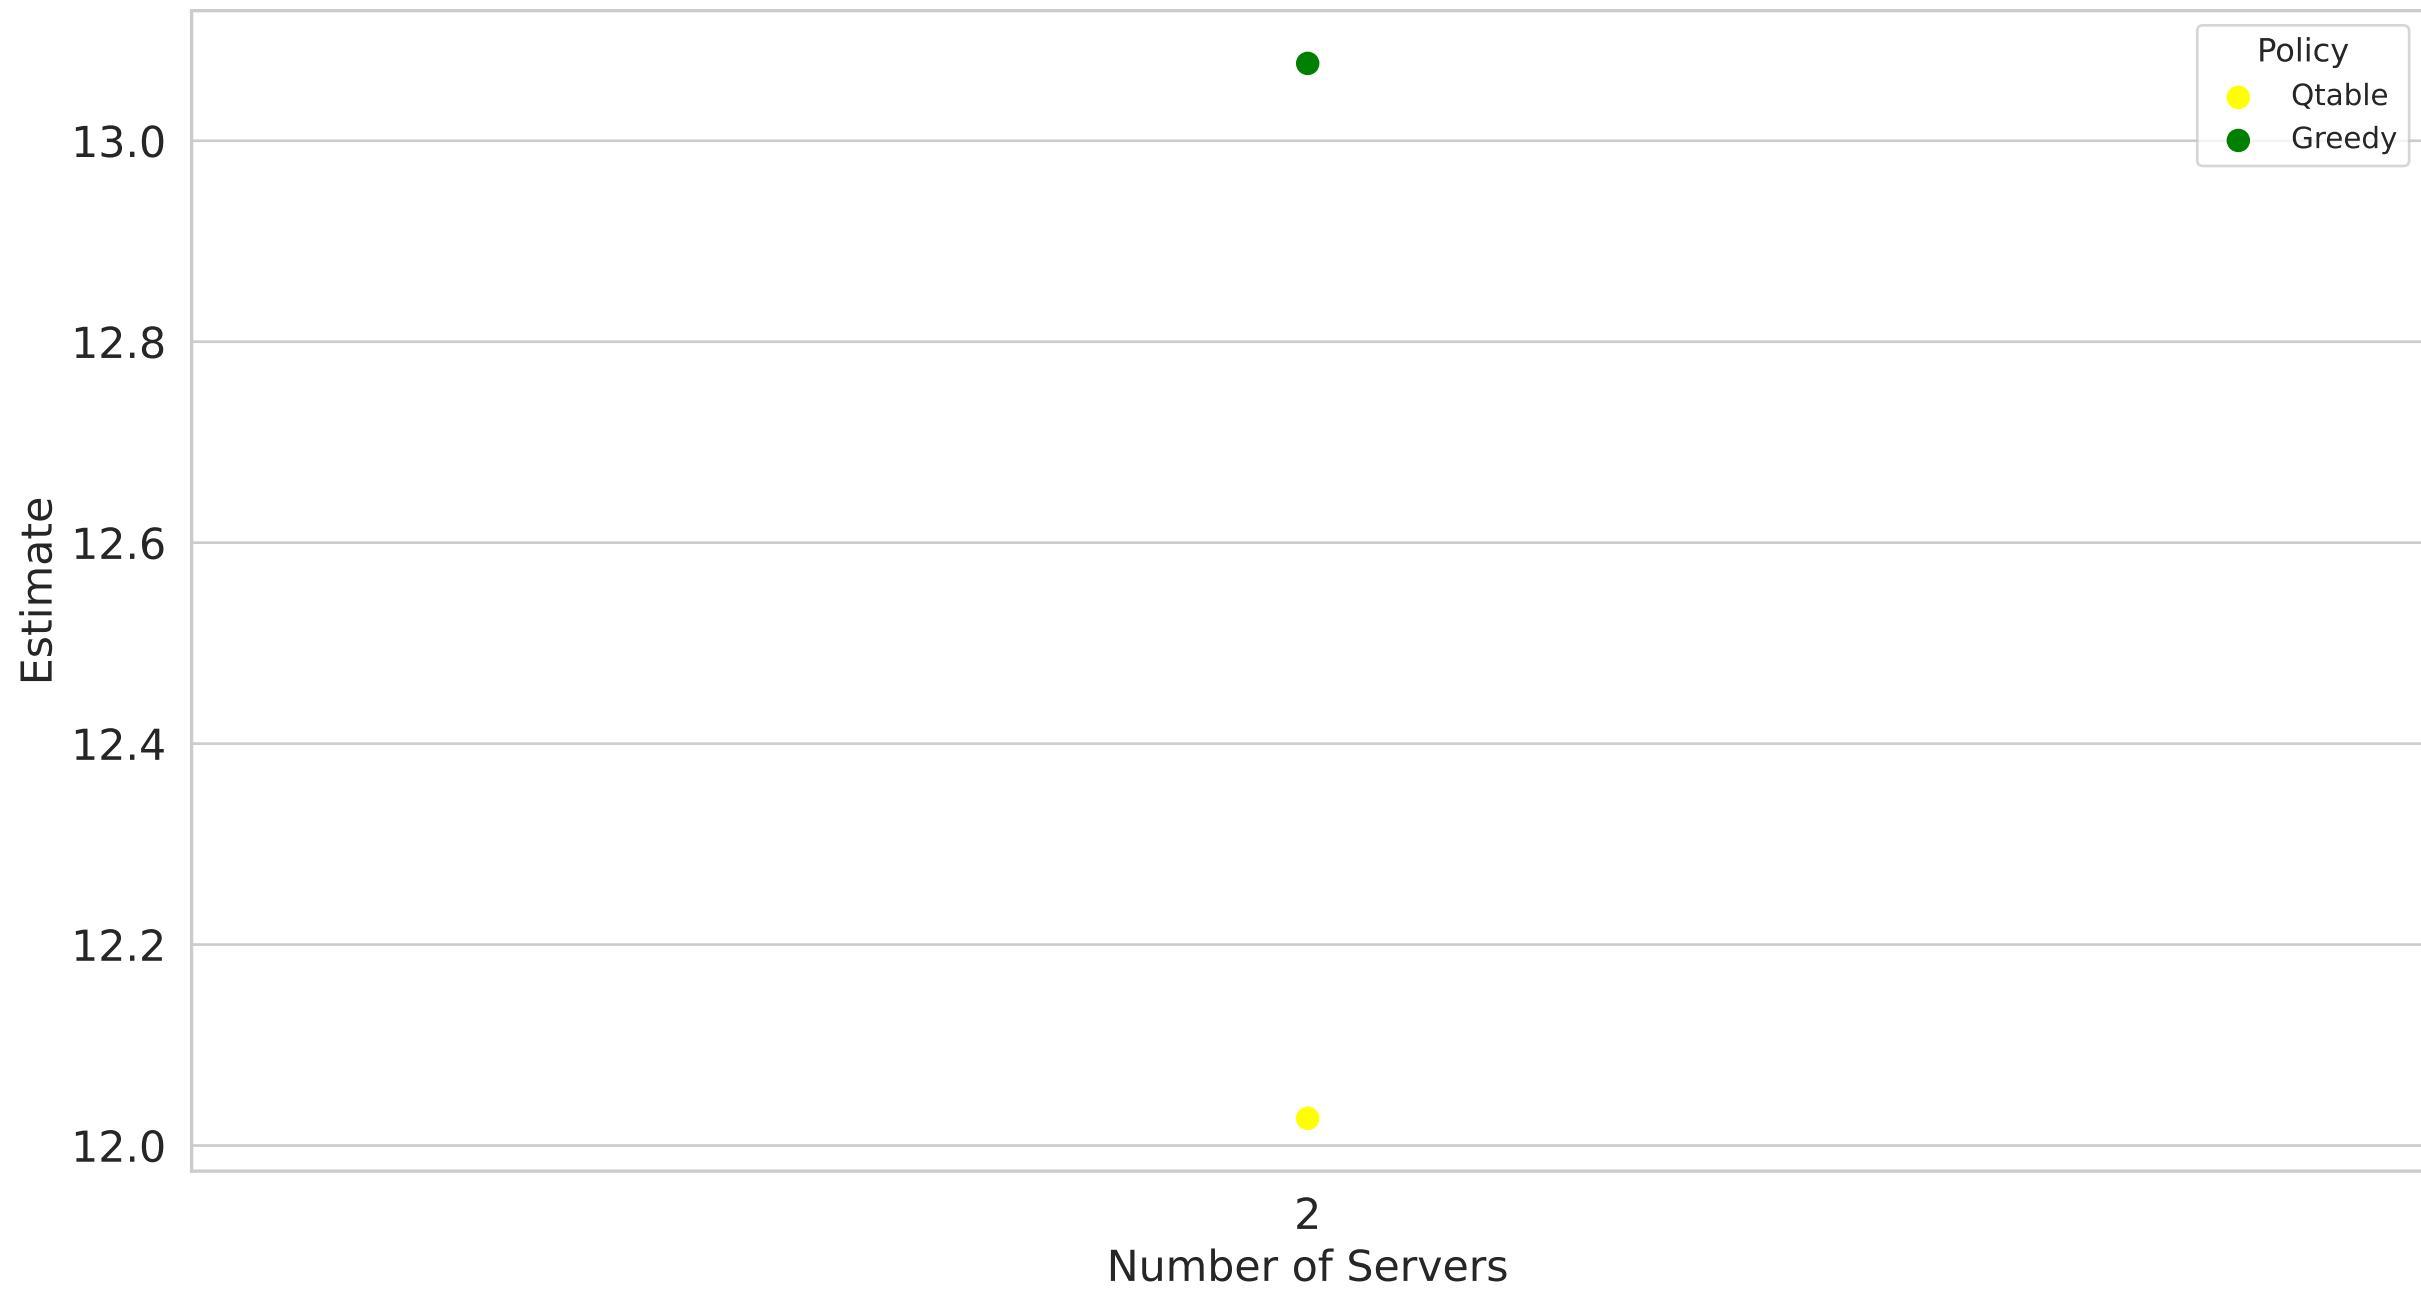

Supplement: supplementary_material [file attachment]

Number of Nodes: 64, Greedy/Qtable

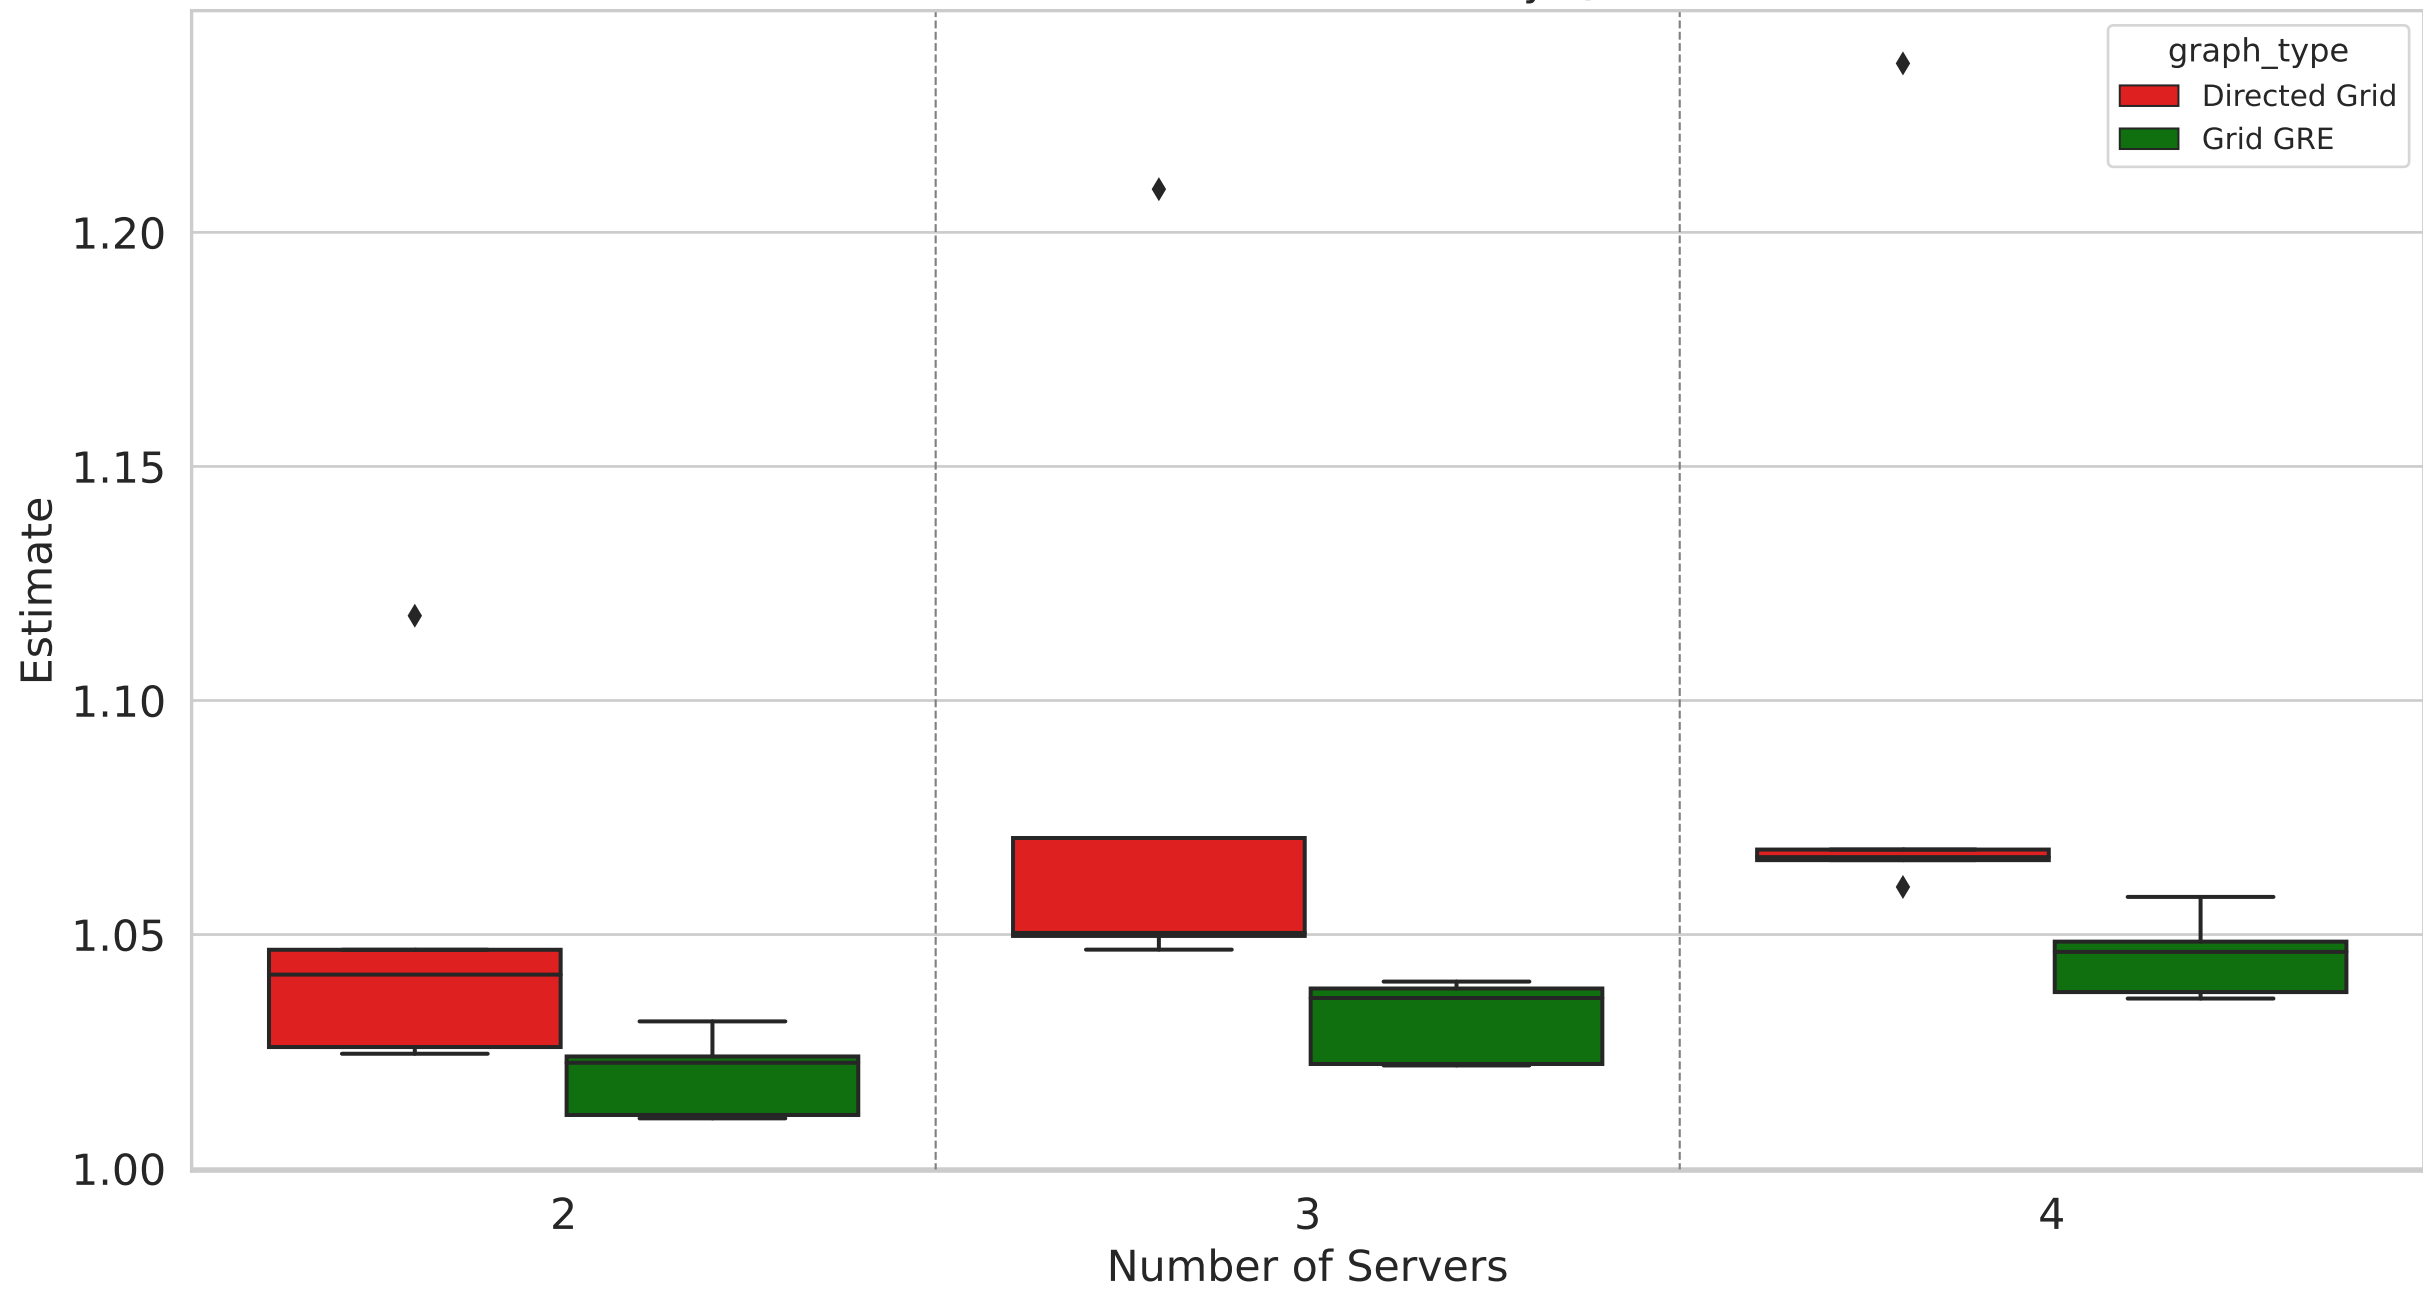

Supplement: supplementary_material [file attachment]

Number of Nodes: 9, Greedy/Qtable

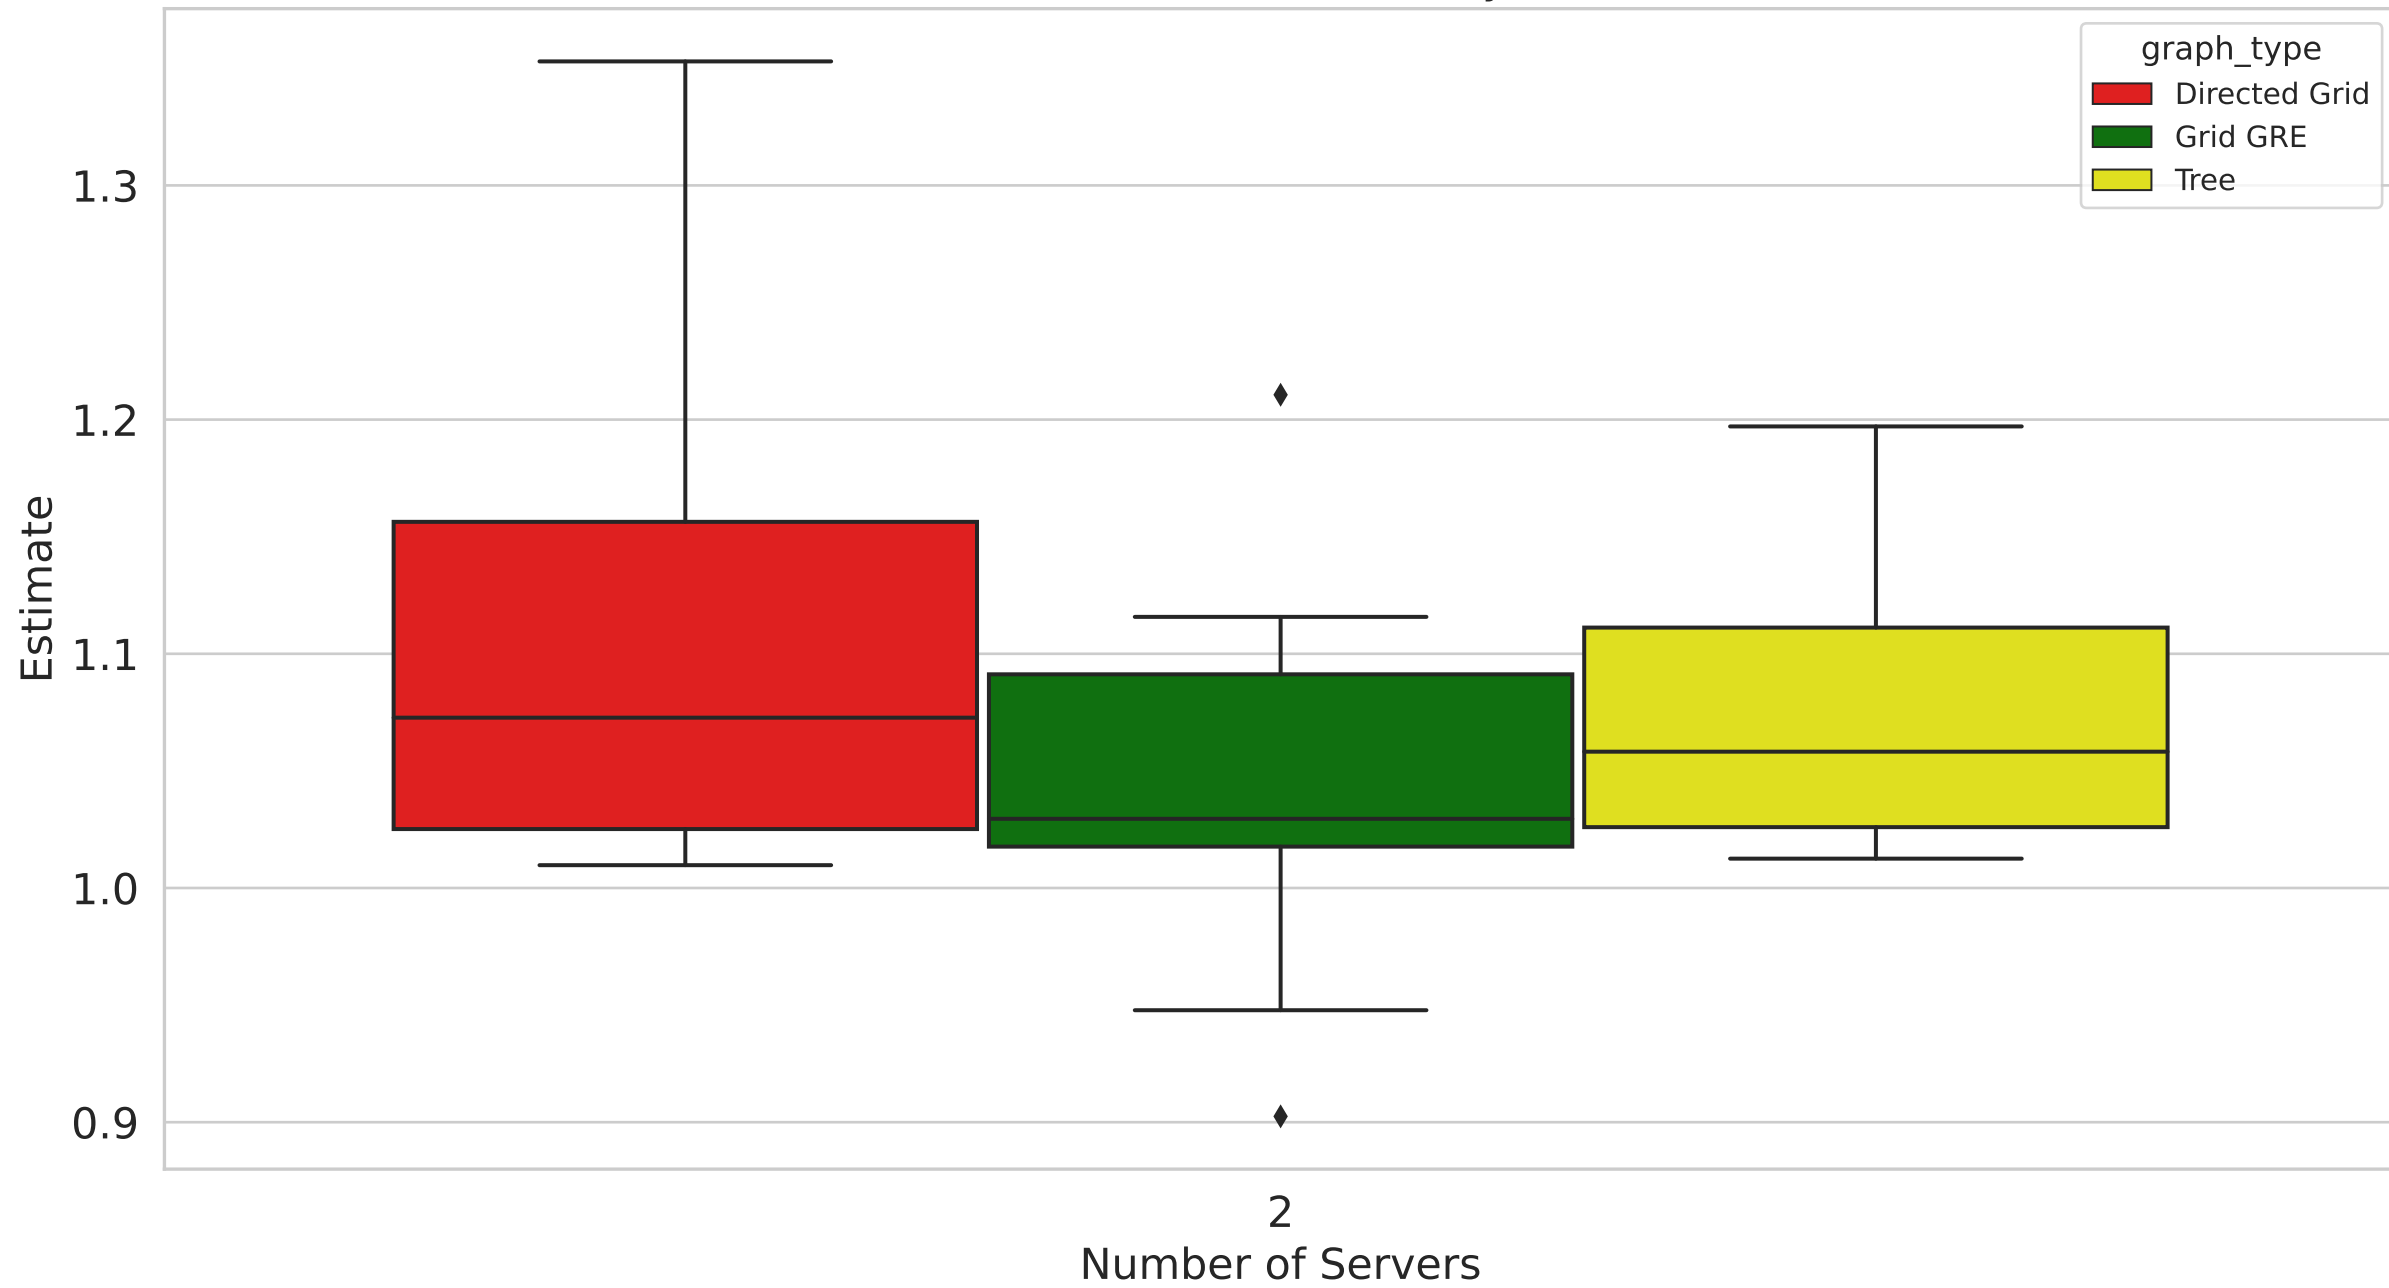

Supplement: supplementary_material [file attachment]

Tree, Number of Nodes: 25

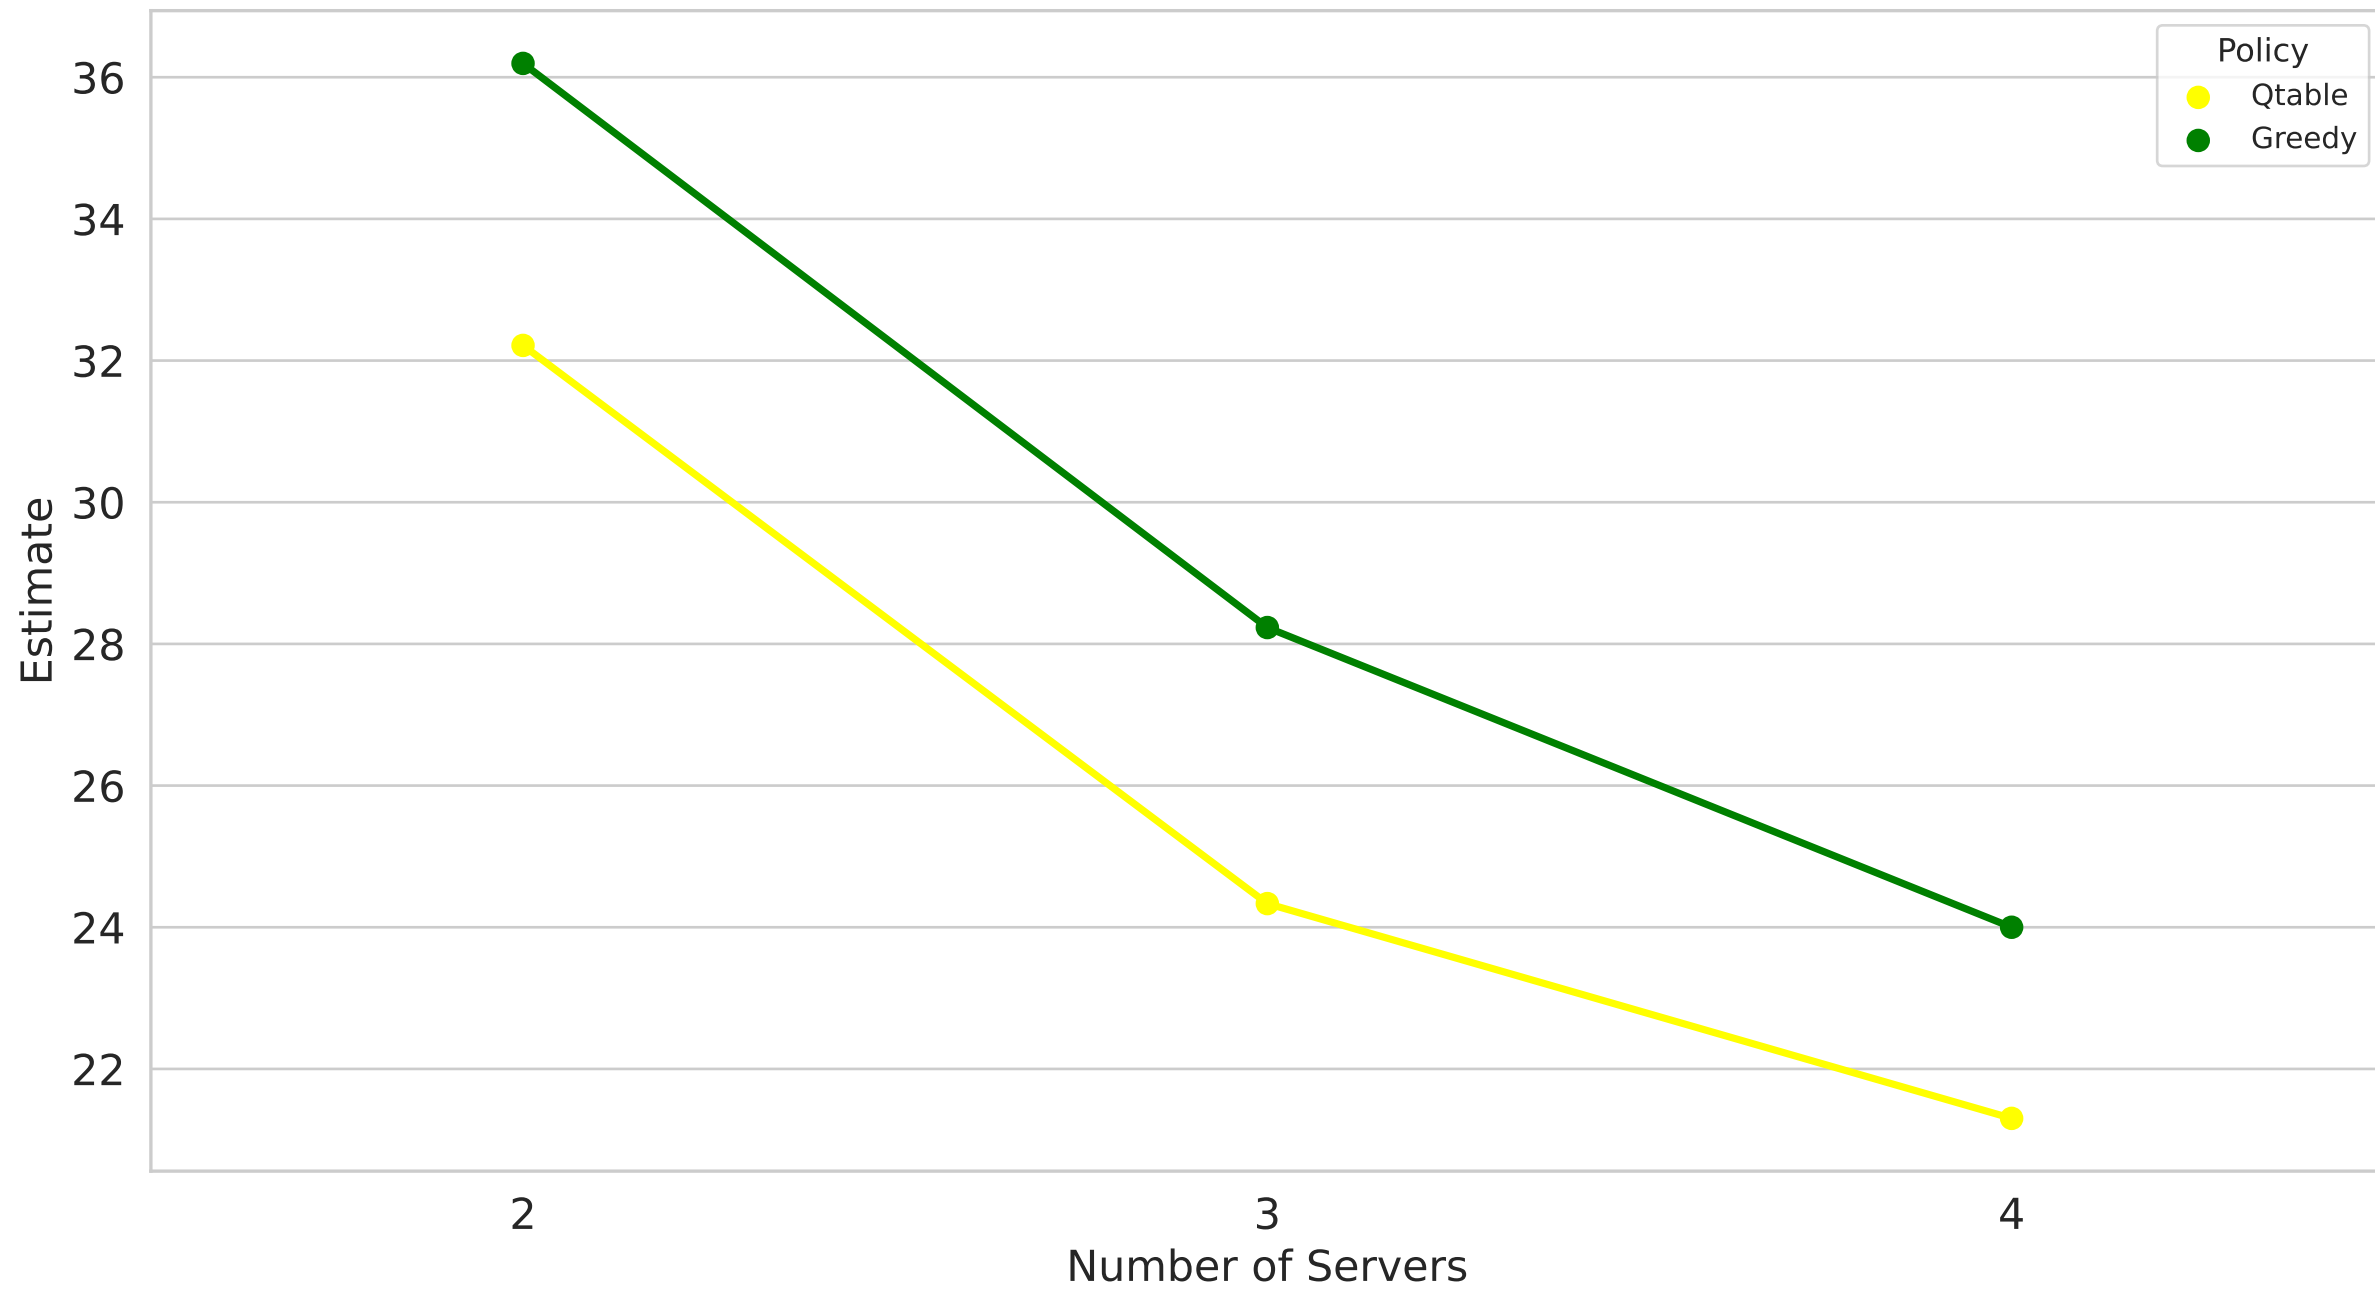

Supplement: supplementary_material [file attachment]

Training Curve for Random Tree with 64 Nodes

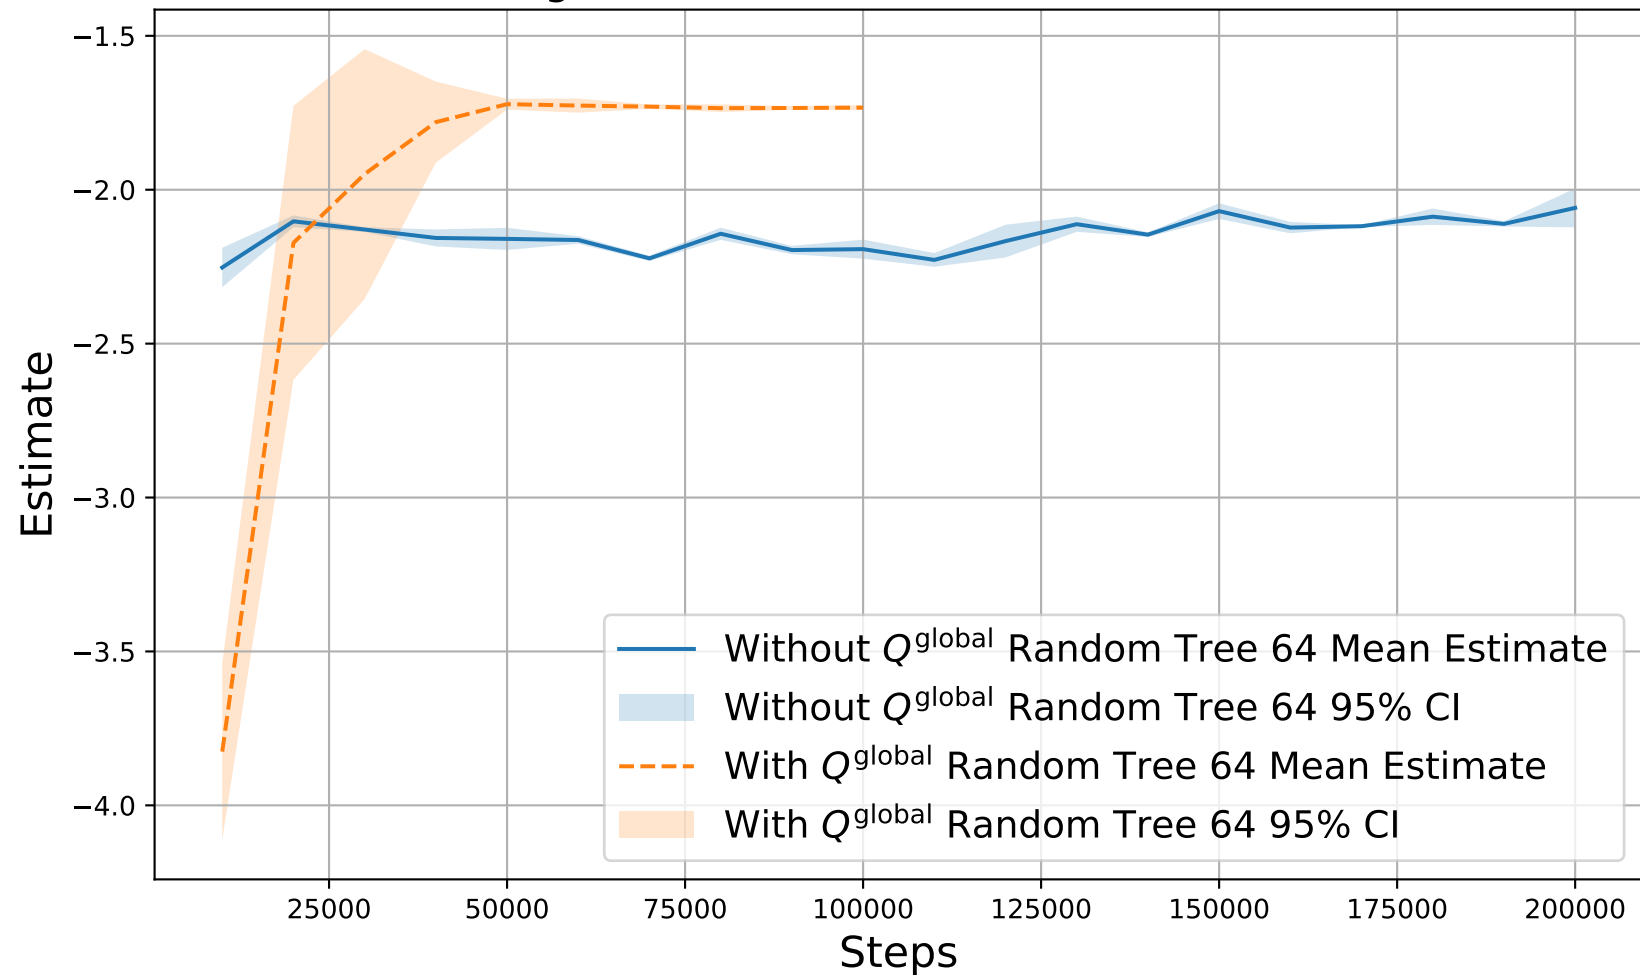

Supplement: supplementary_material [file attachment]

Grid, Number of Nodes: 36

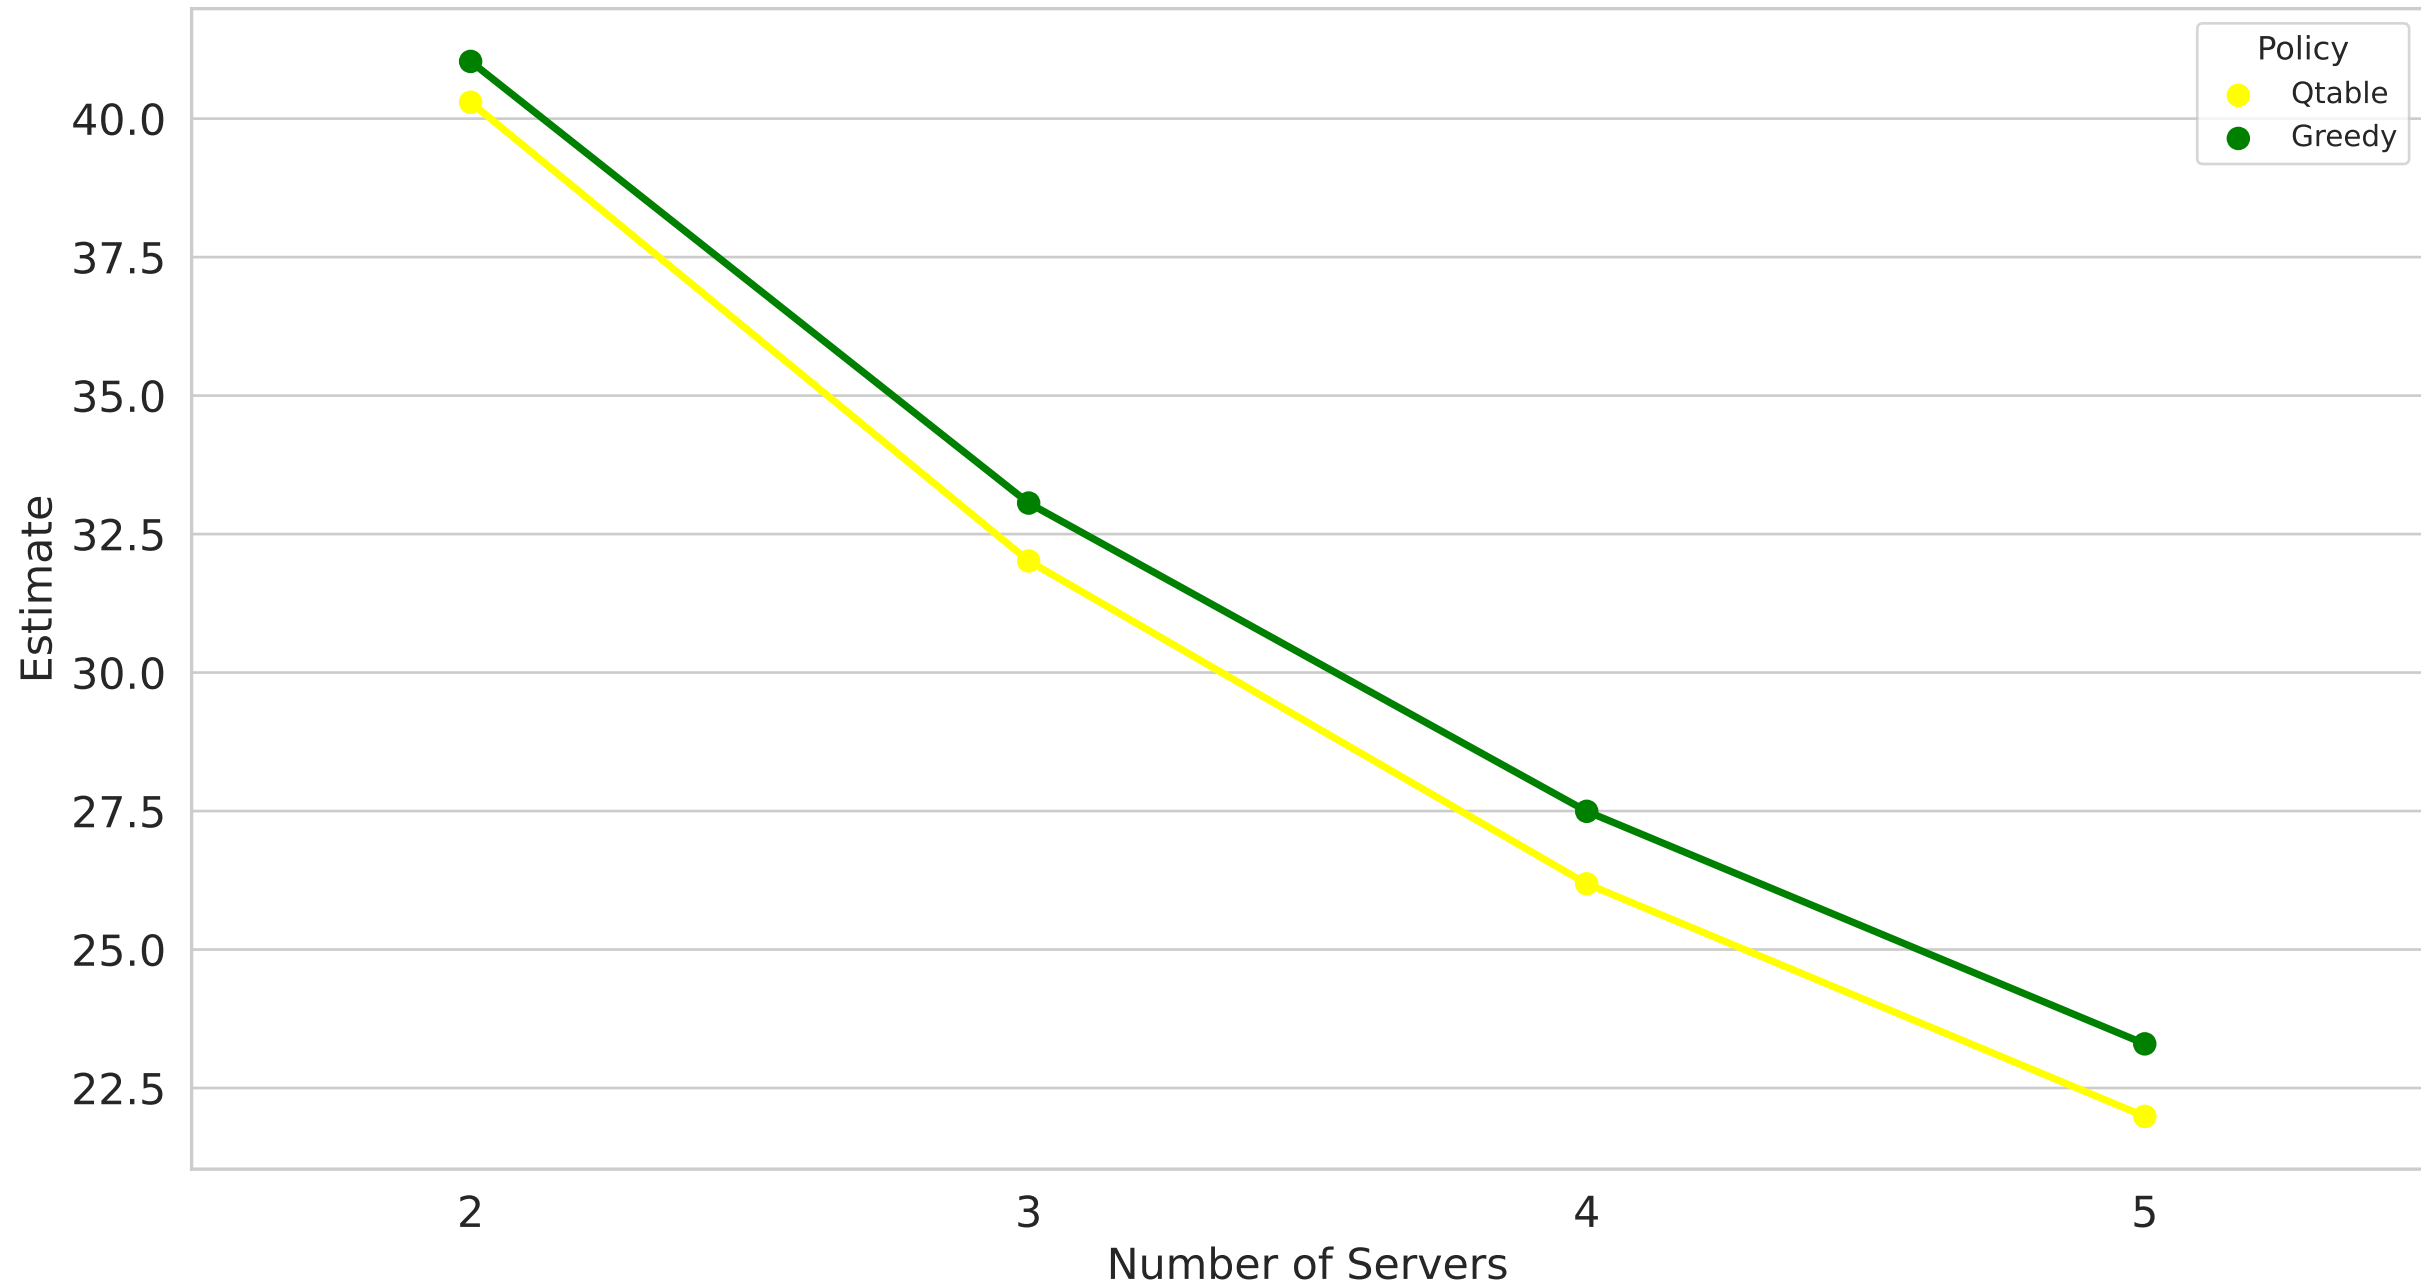

Supplement: supplementary_material [file attachment]

# Training Curve for Grid with 36 Nodes

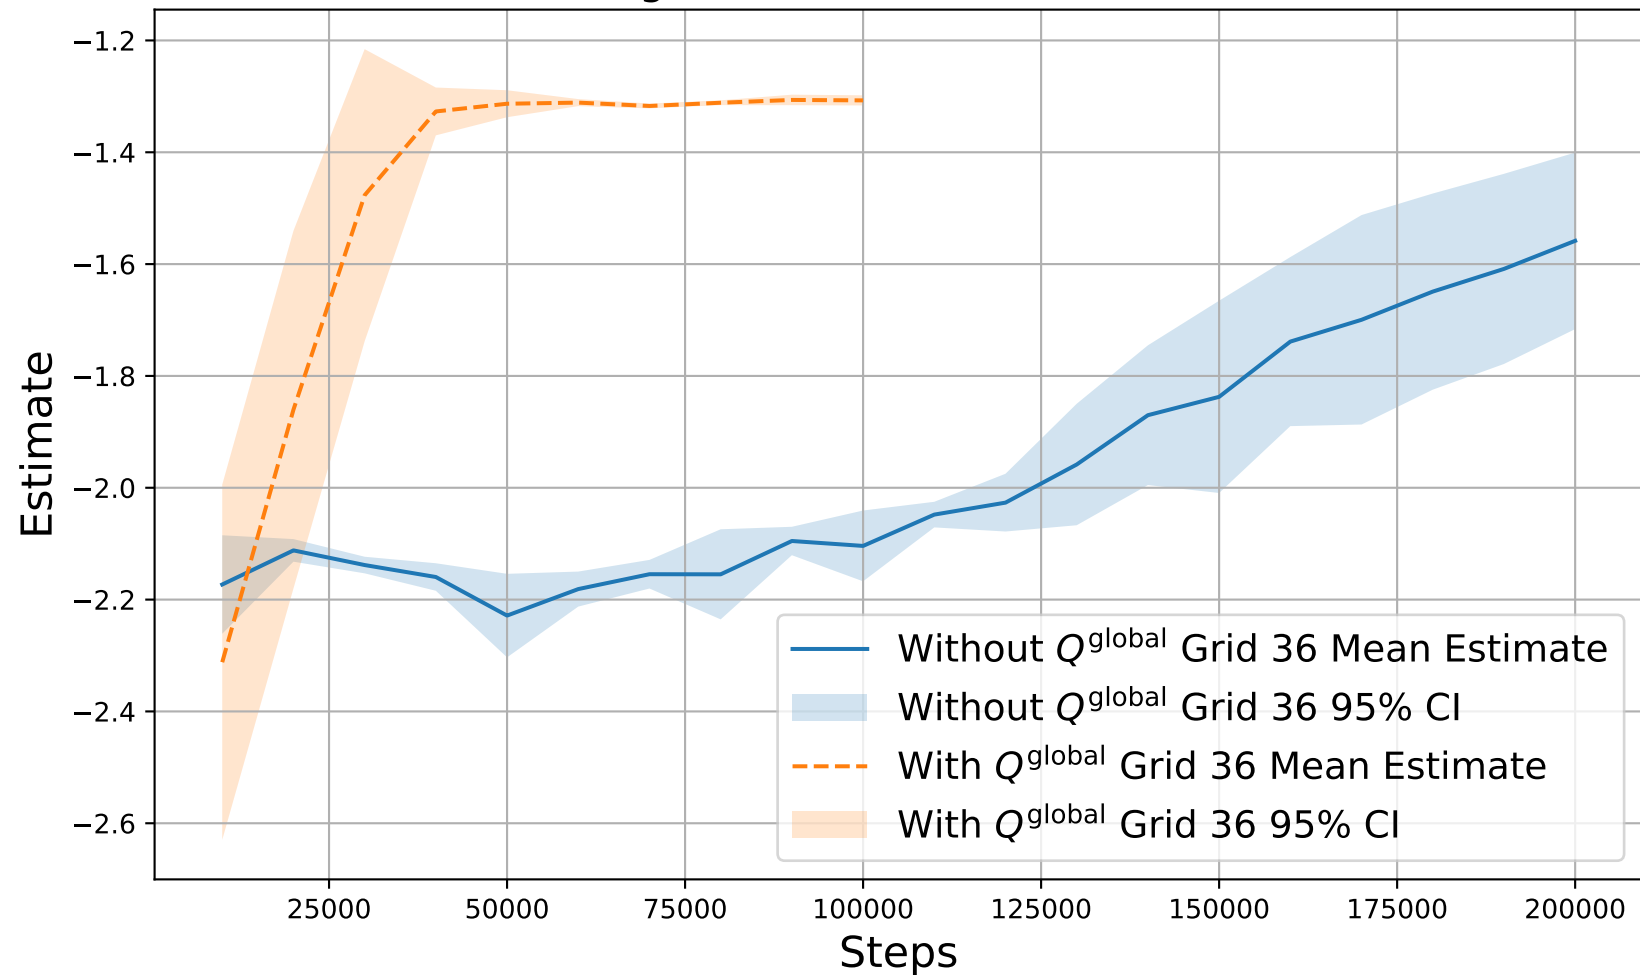

Supplement: supplementary_material [file attachment]

Tree, Number of Nodes: 16

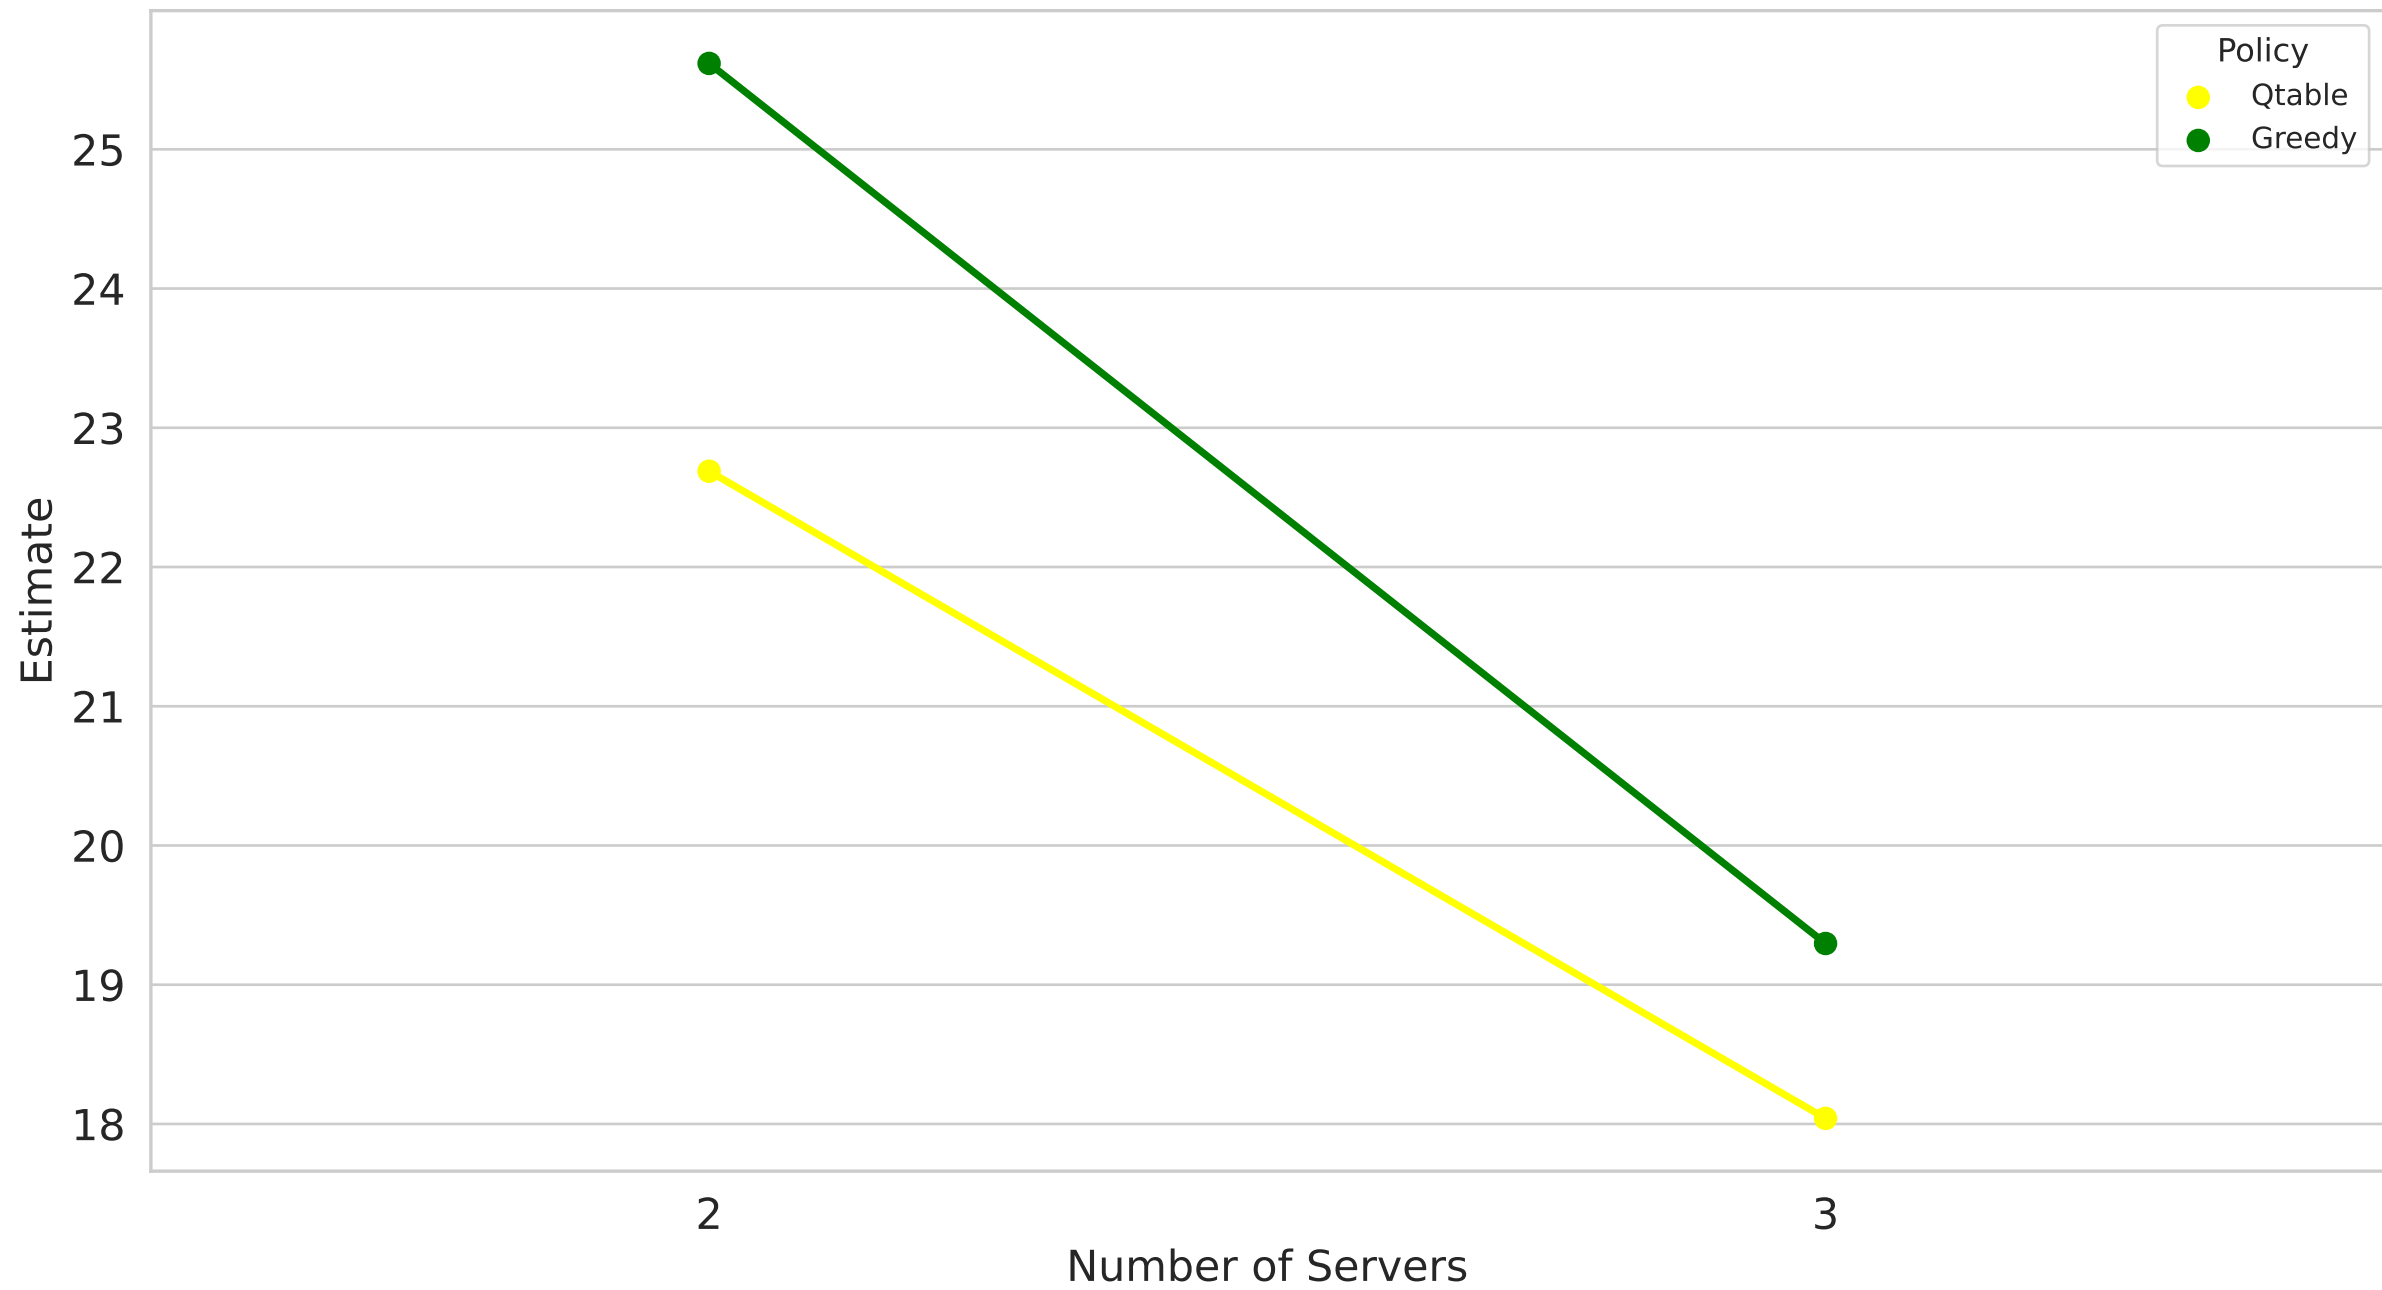

Supplement: supplementary_material [file attachment]

Number of Nodes: 81, Greedy/Qtable

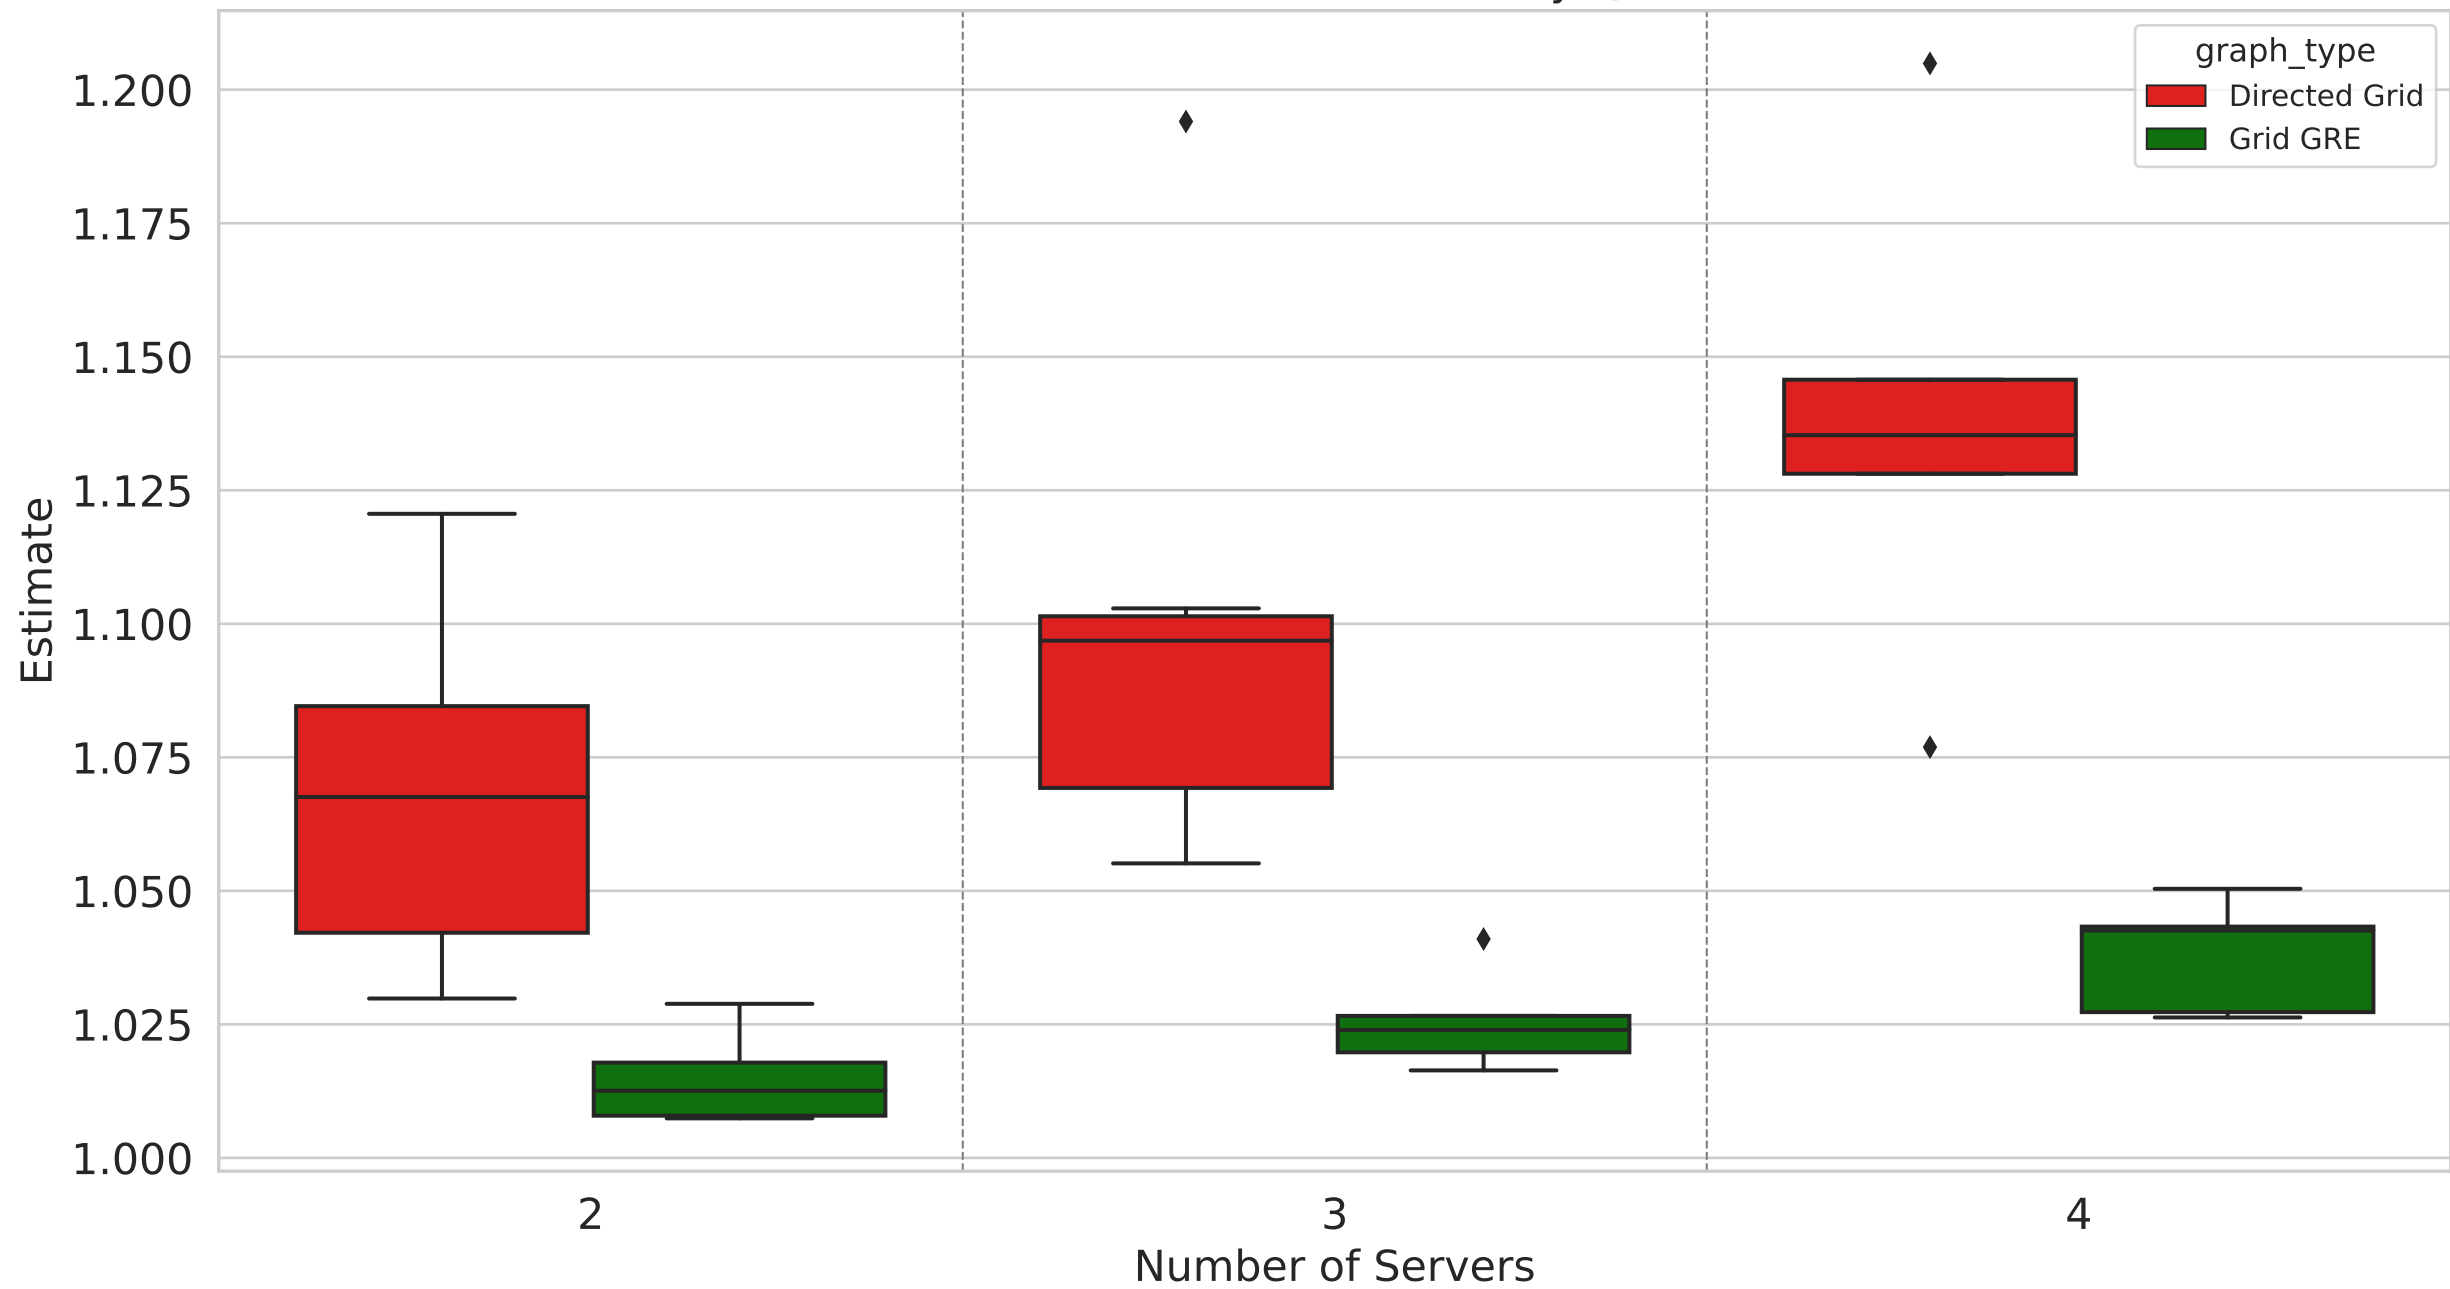

Supplement: supplementary_material [file attachment]

Number of Nodes: 25, Greedy/Qtable

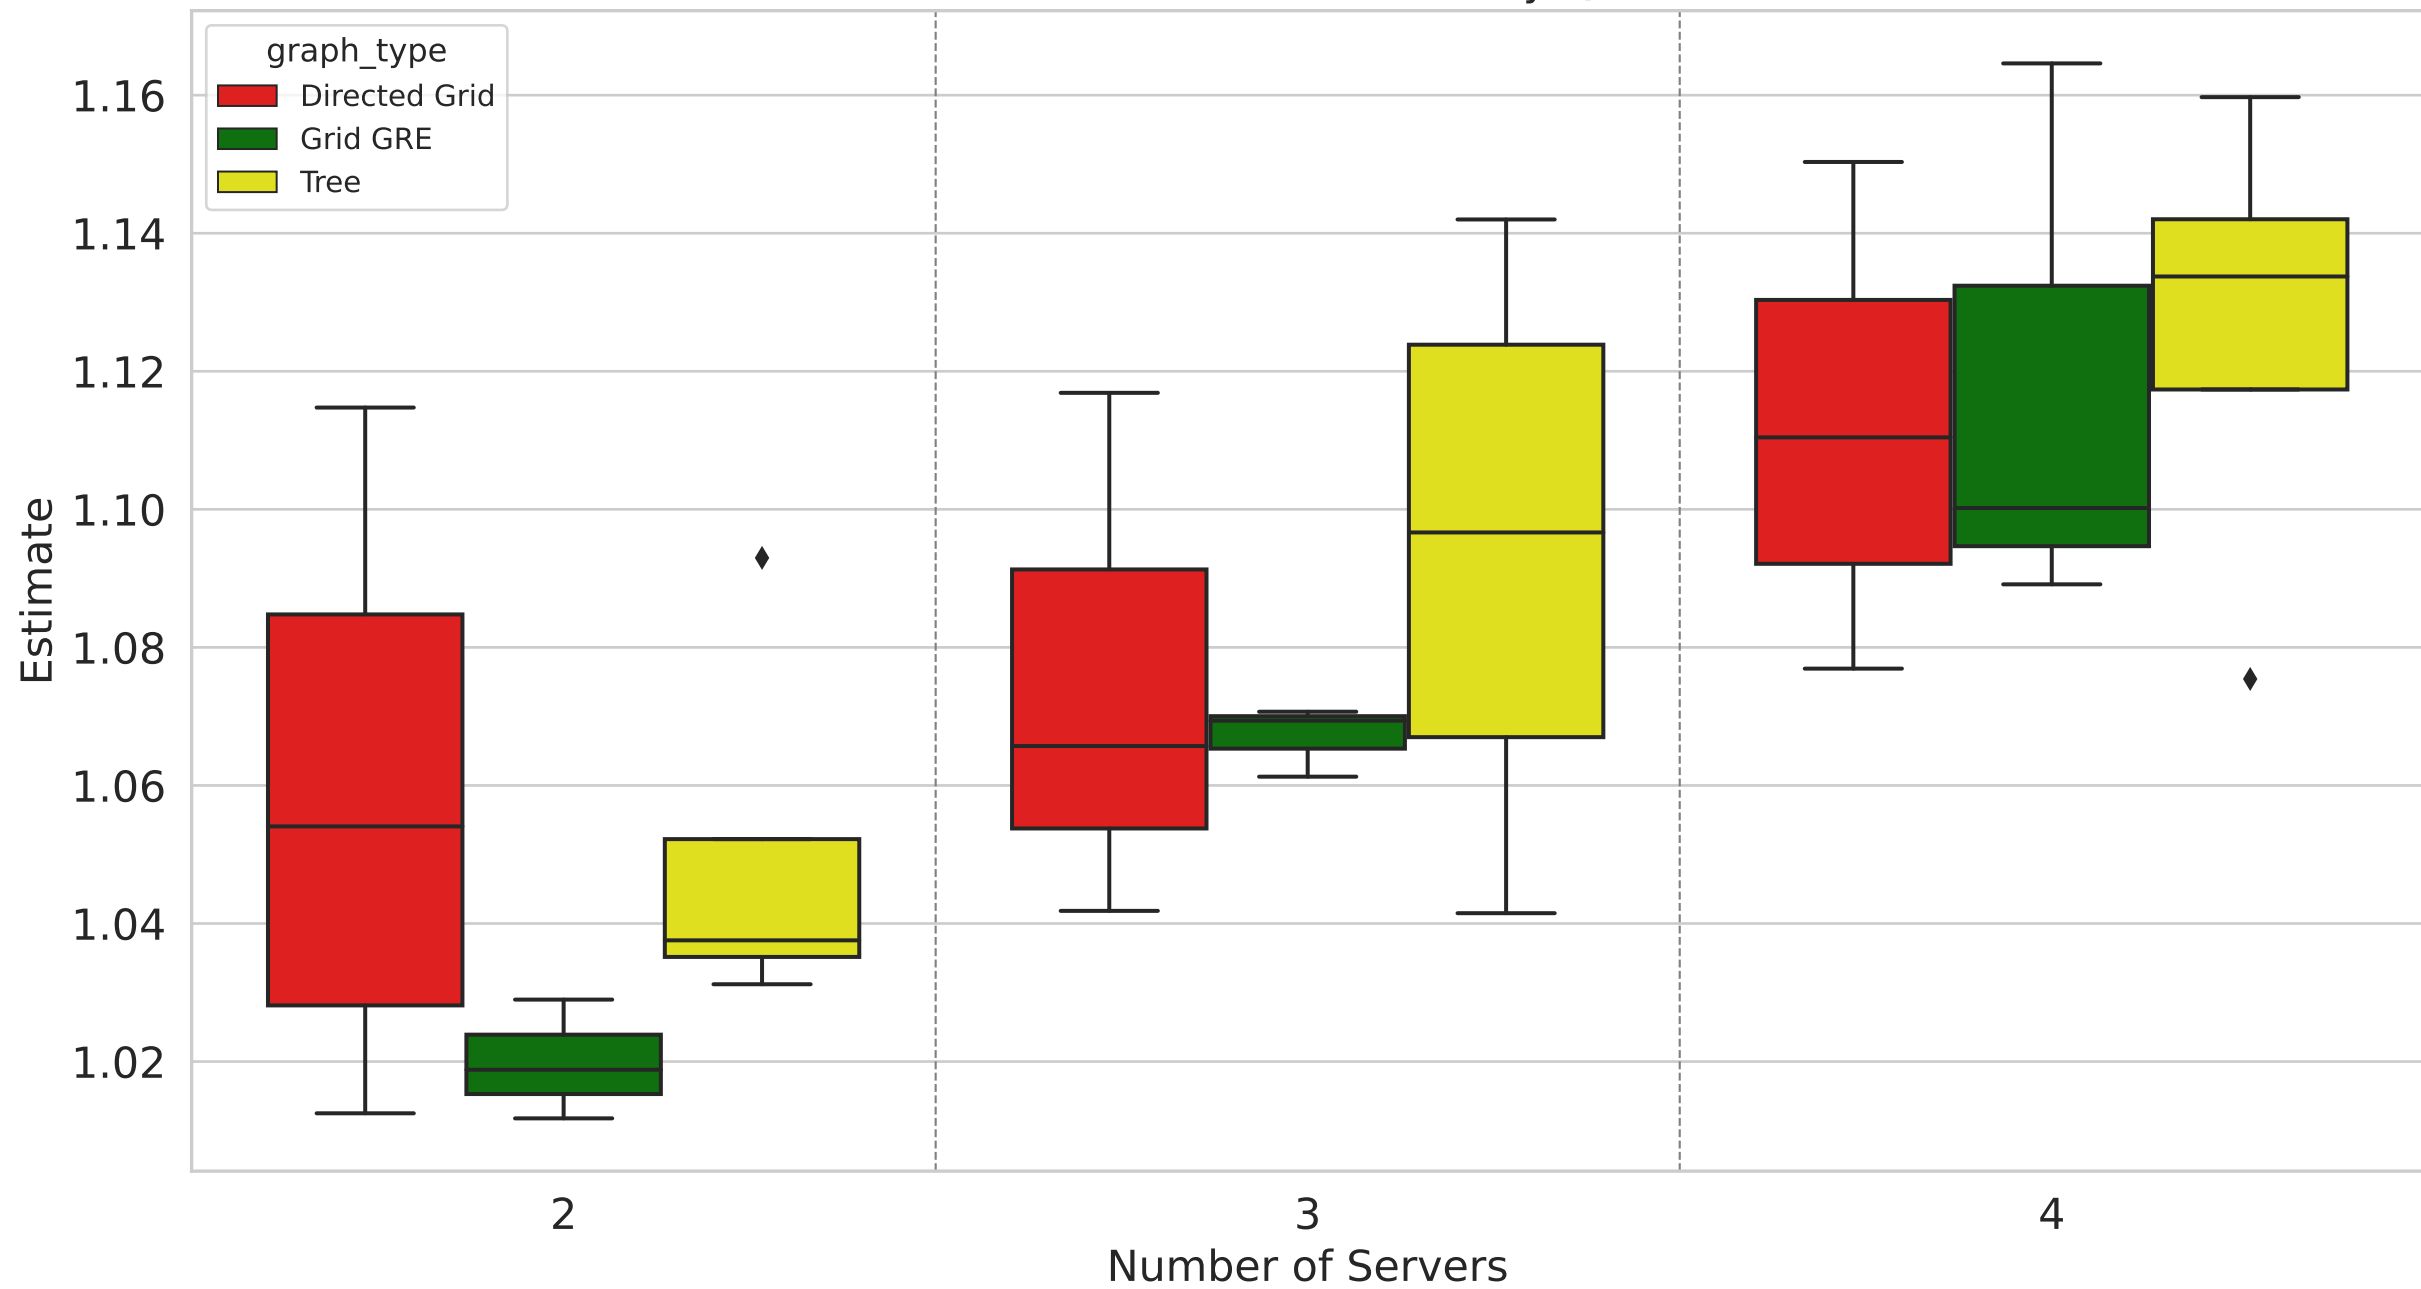

Supplement: supplementary_material [file attachment]

Tree, Number of Nodes: 36

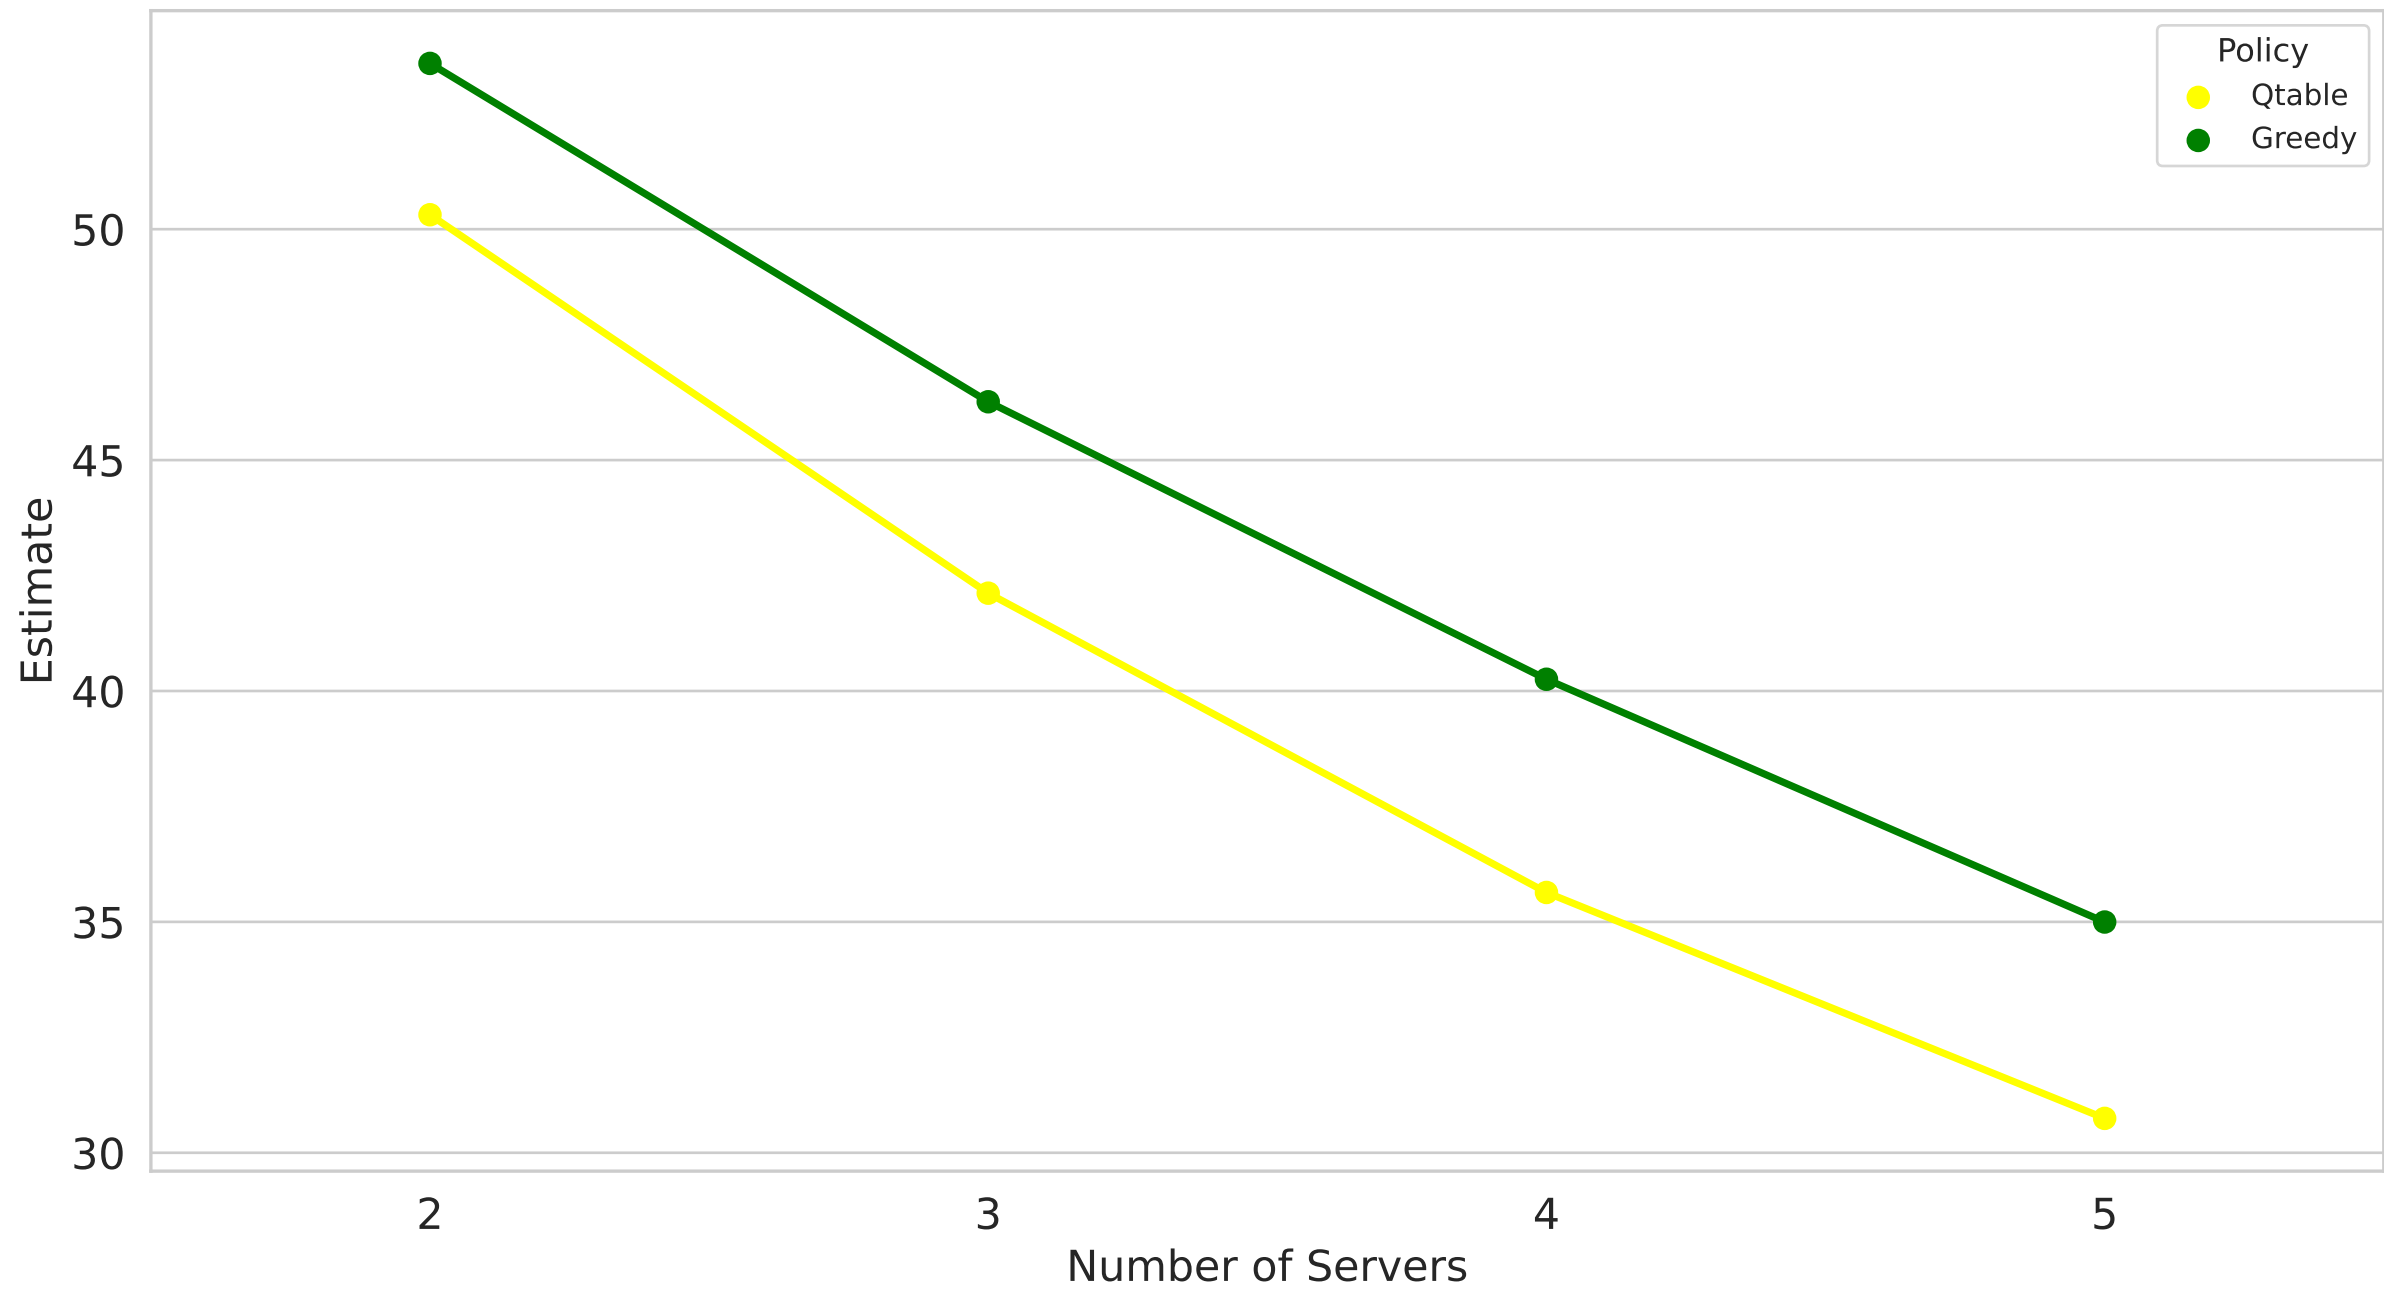

Supplement: supplementary_material [file attachment]

Grid, Number of Nodes: 16

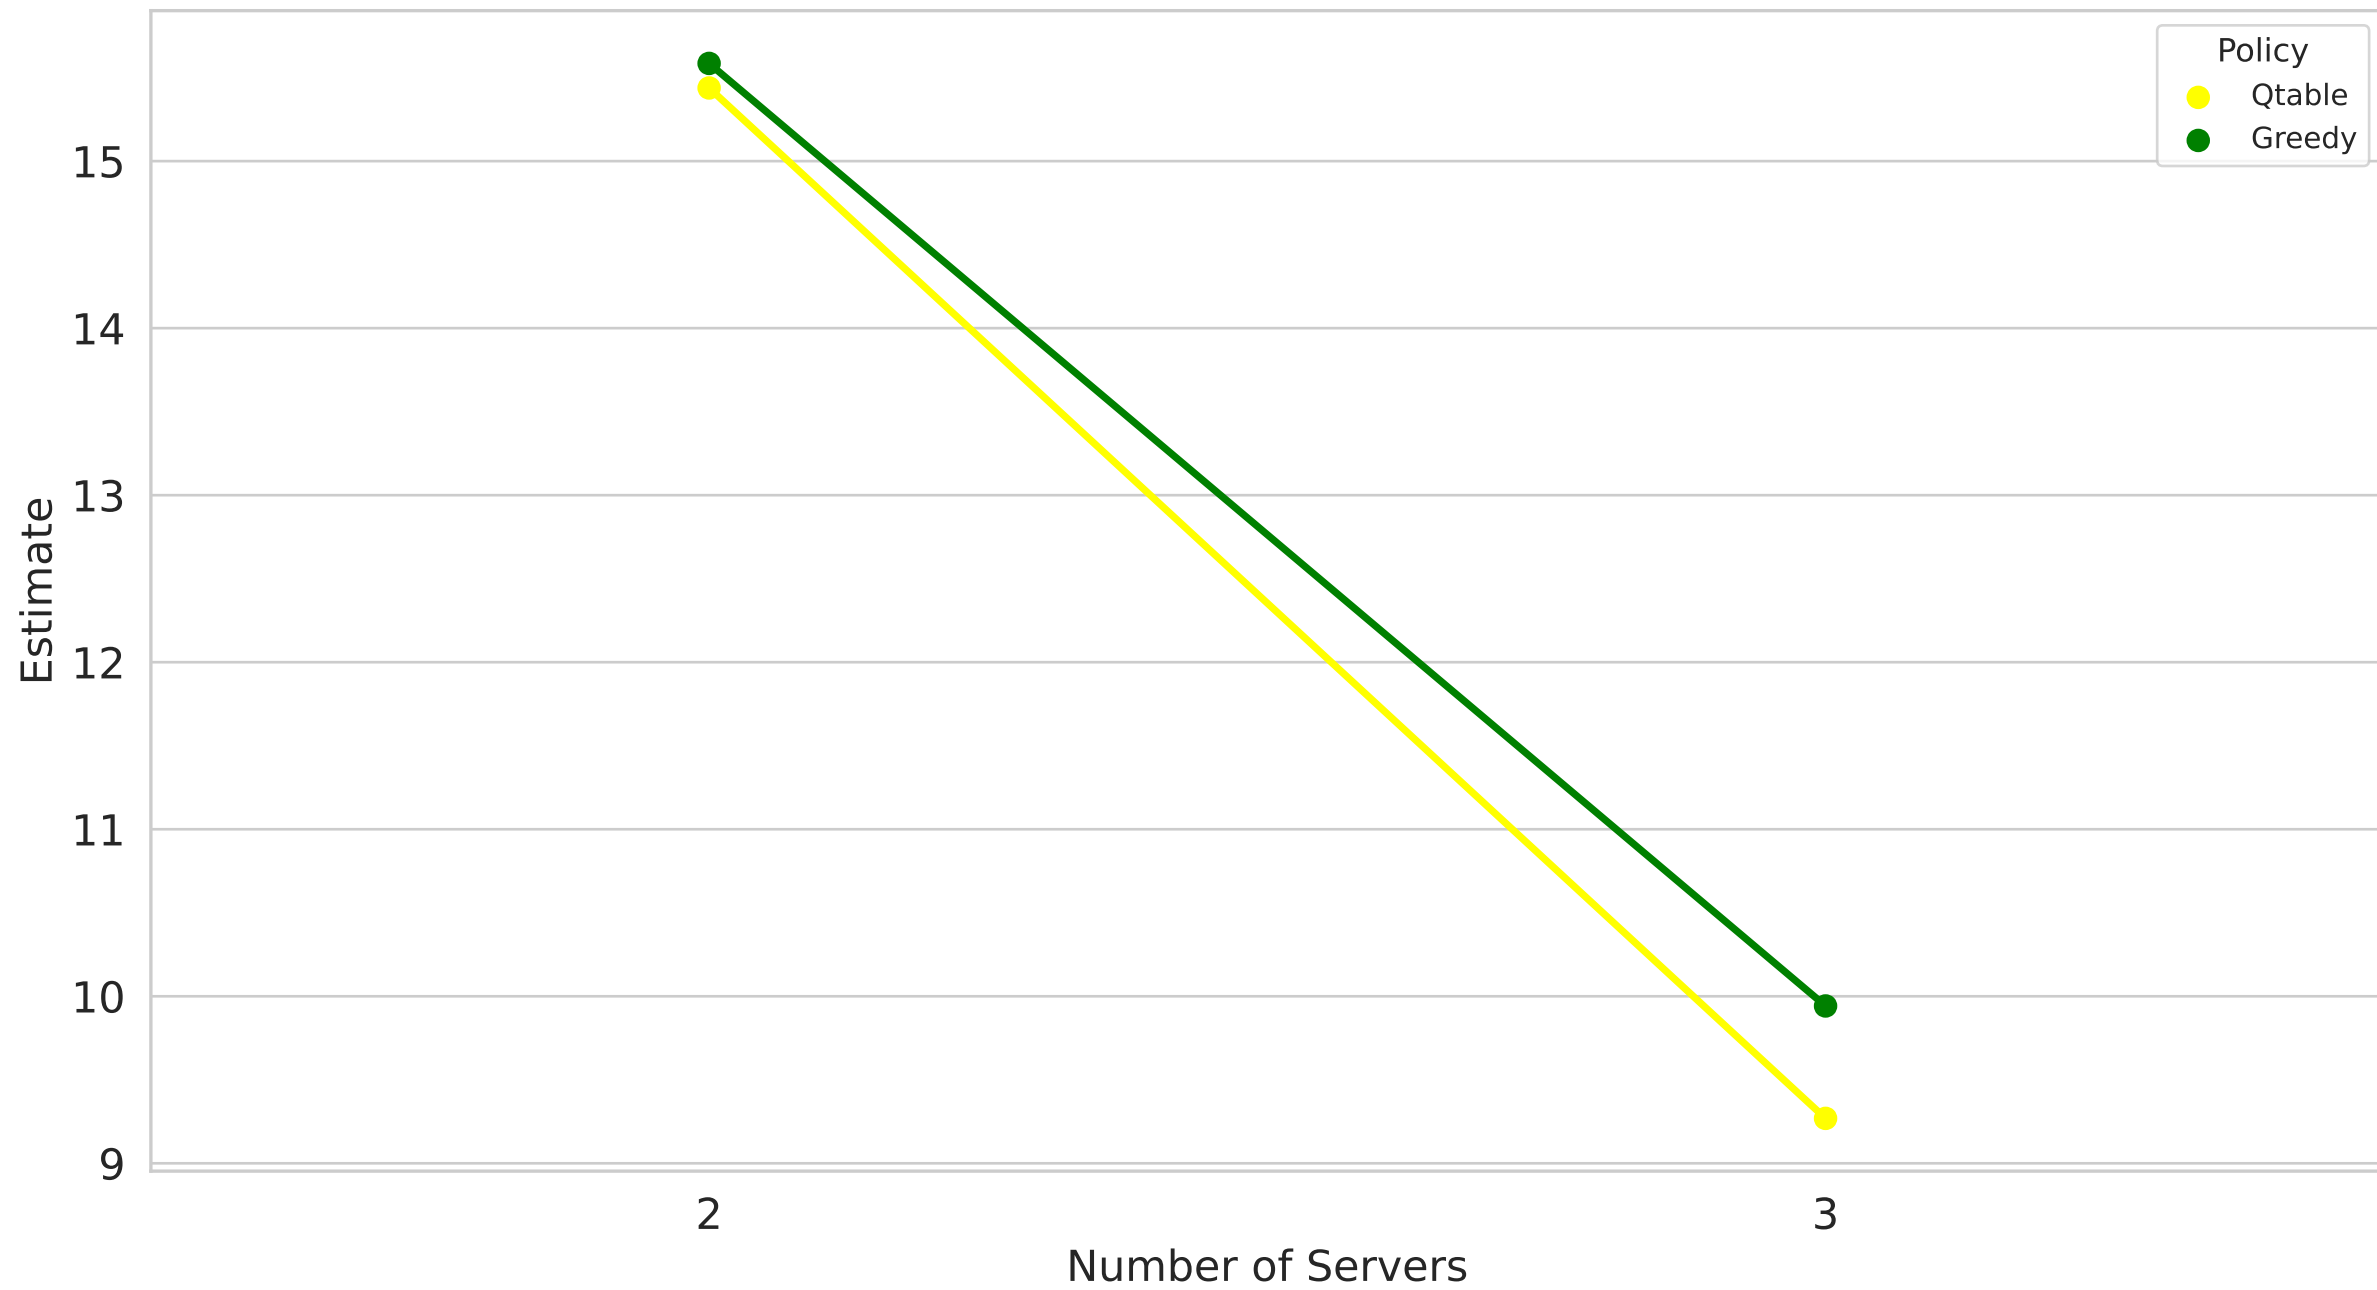

Supplement: supplementary_material [file attachment]

Grid, Number of Nodes: 25

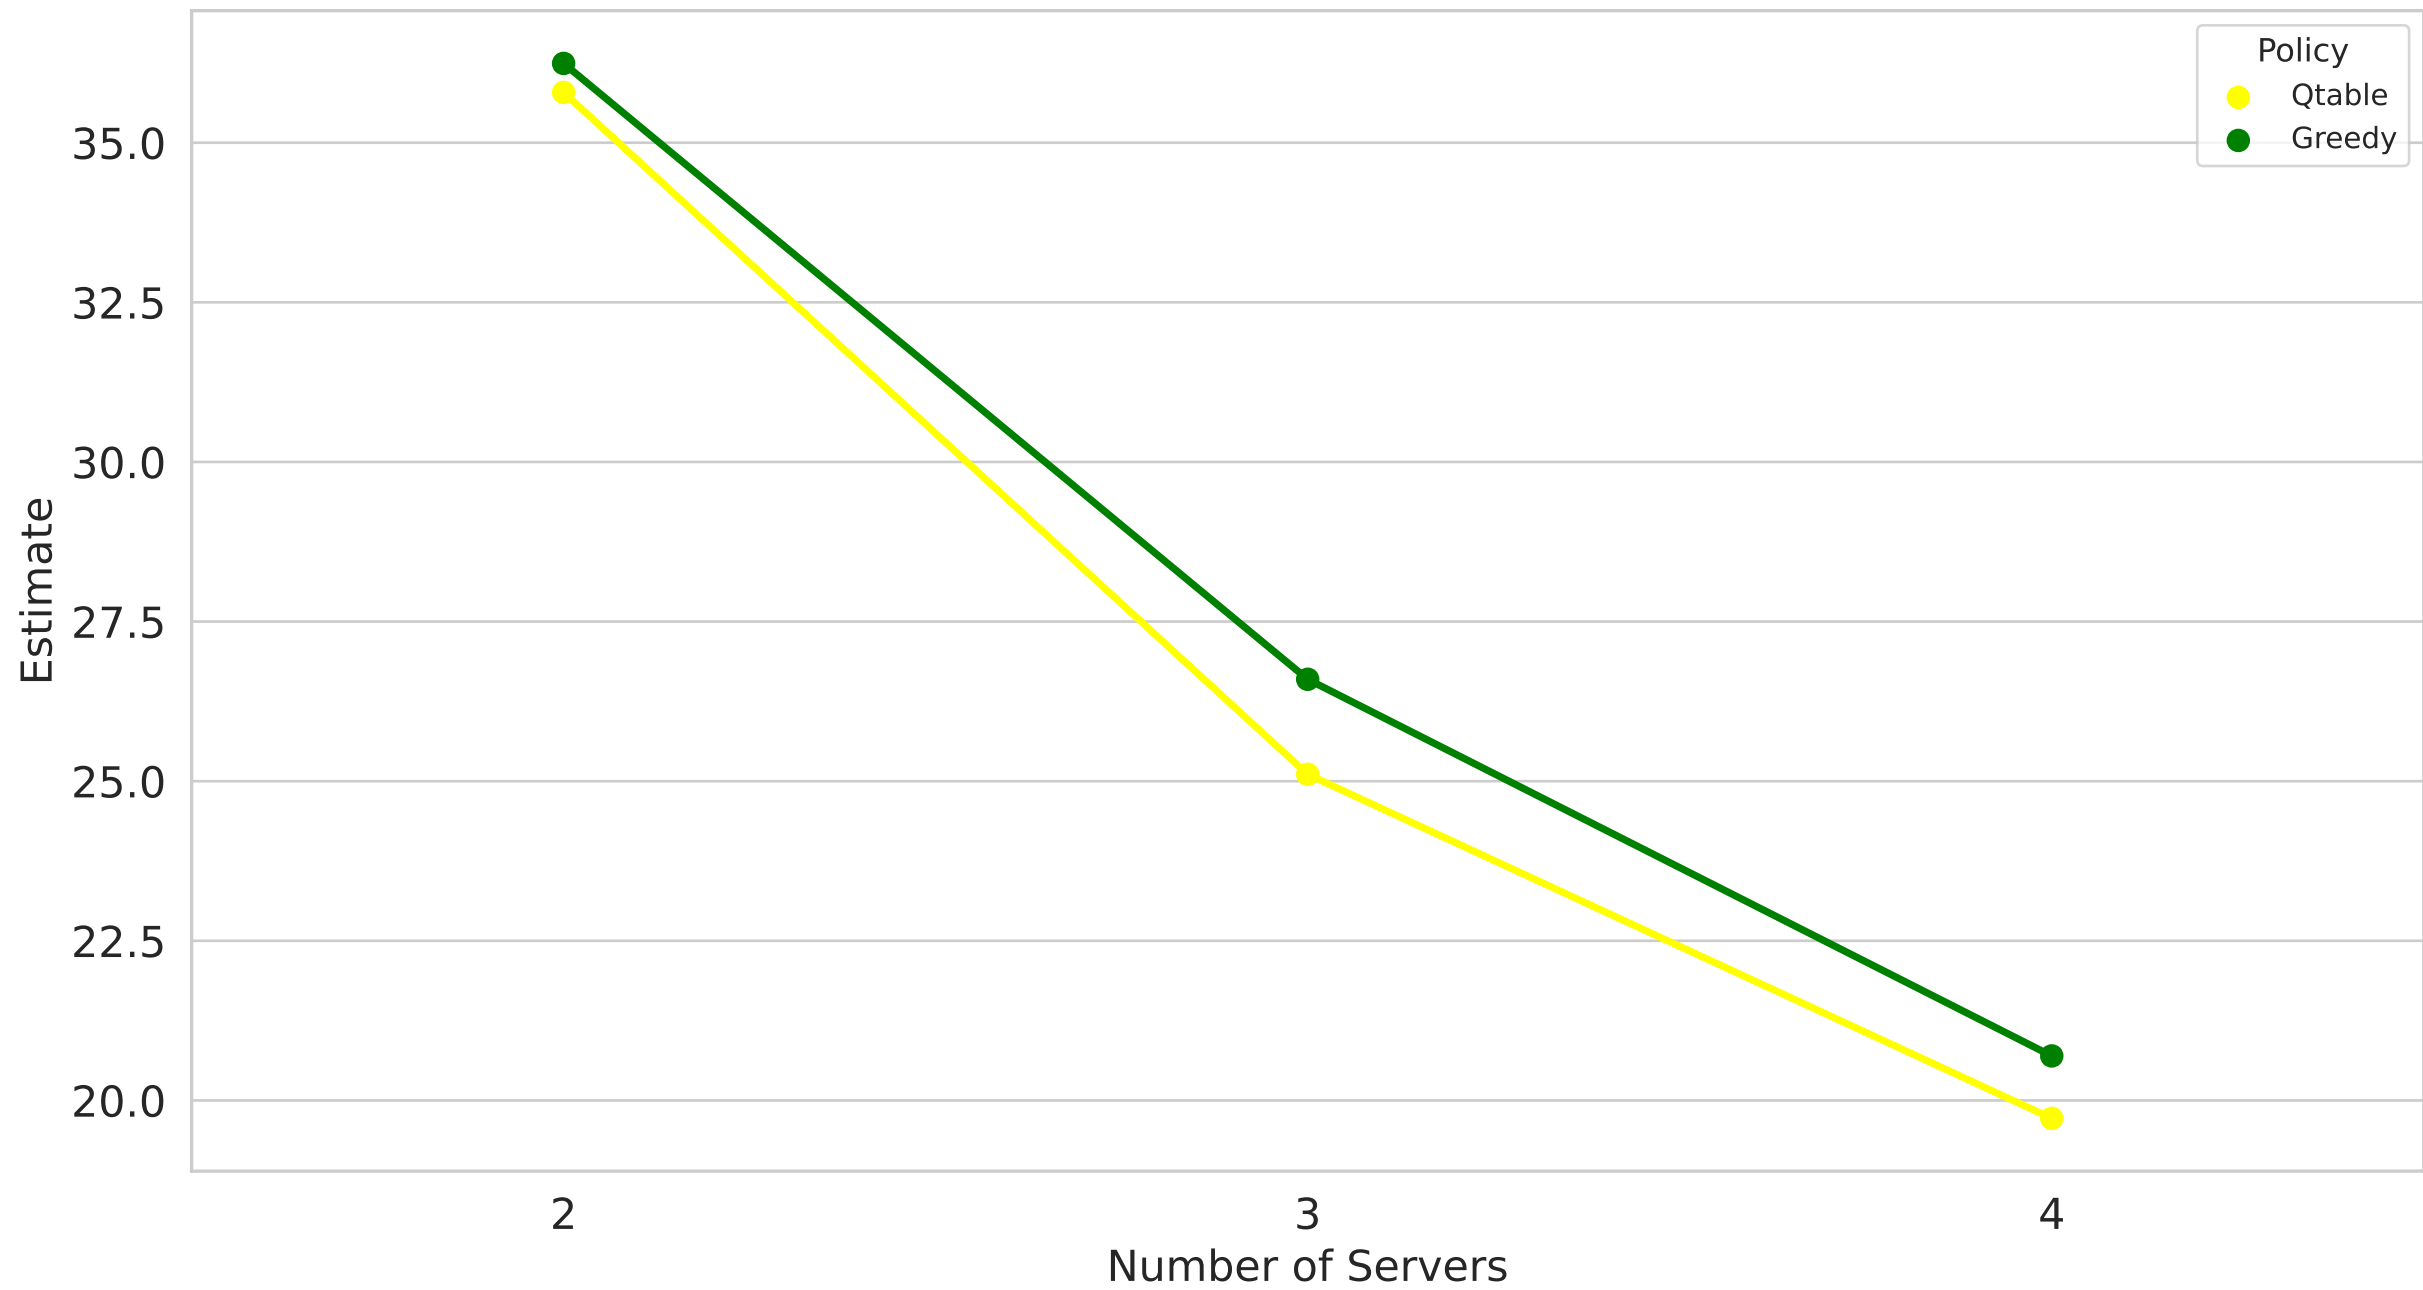

Supplement: supplementary_material [file attachment]

Number of Nodes: 49, Greedy/Qtable

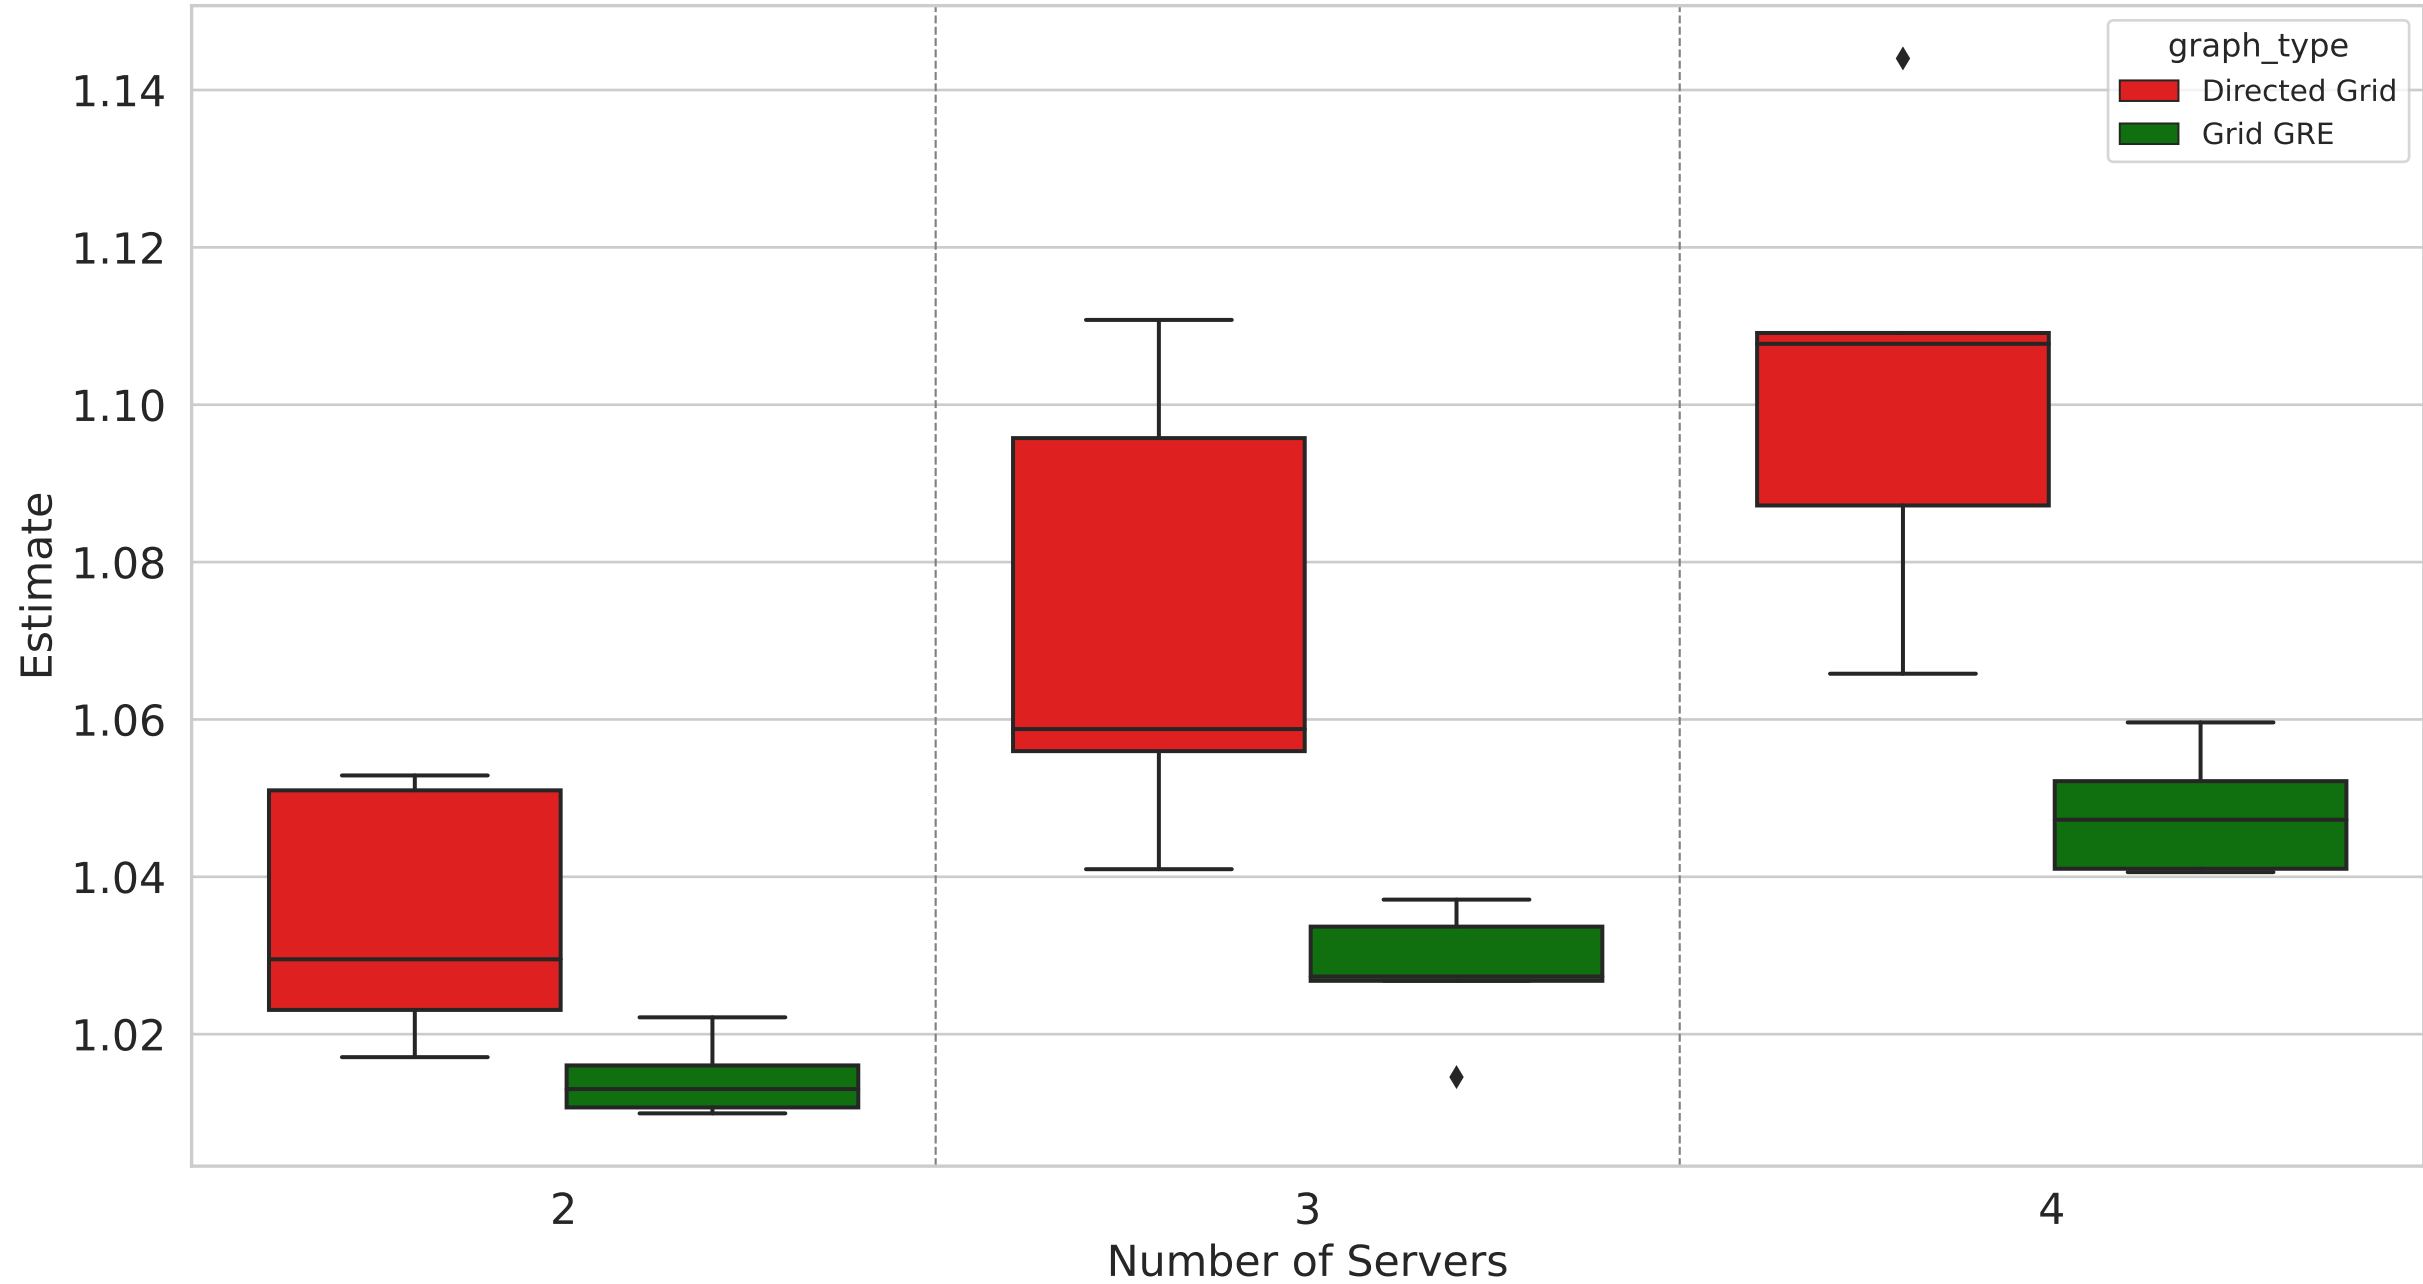

Supplement: supplementary_material [file attachment]

Sioux Falls, Number of Nodes: 24

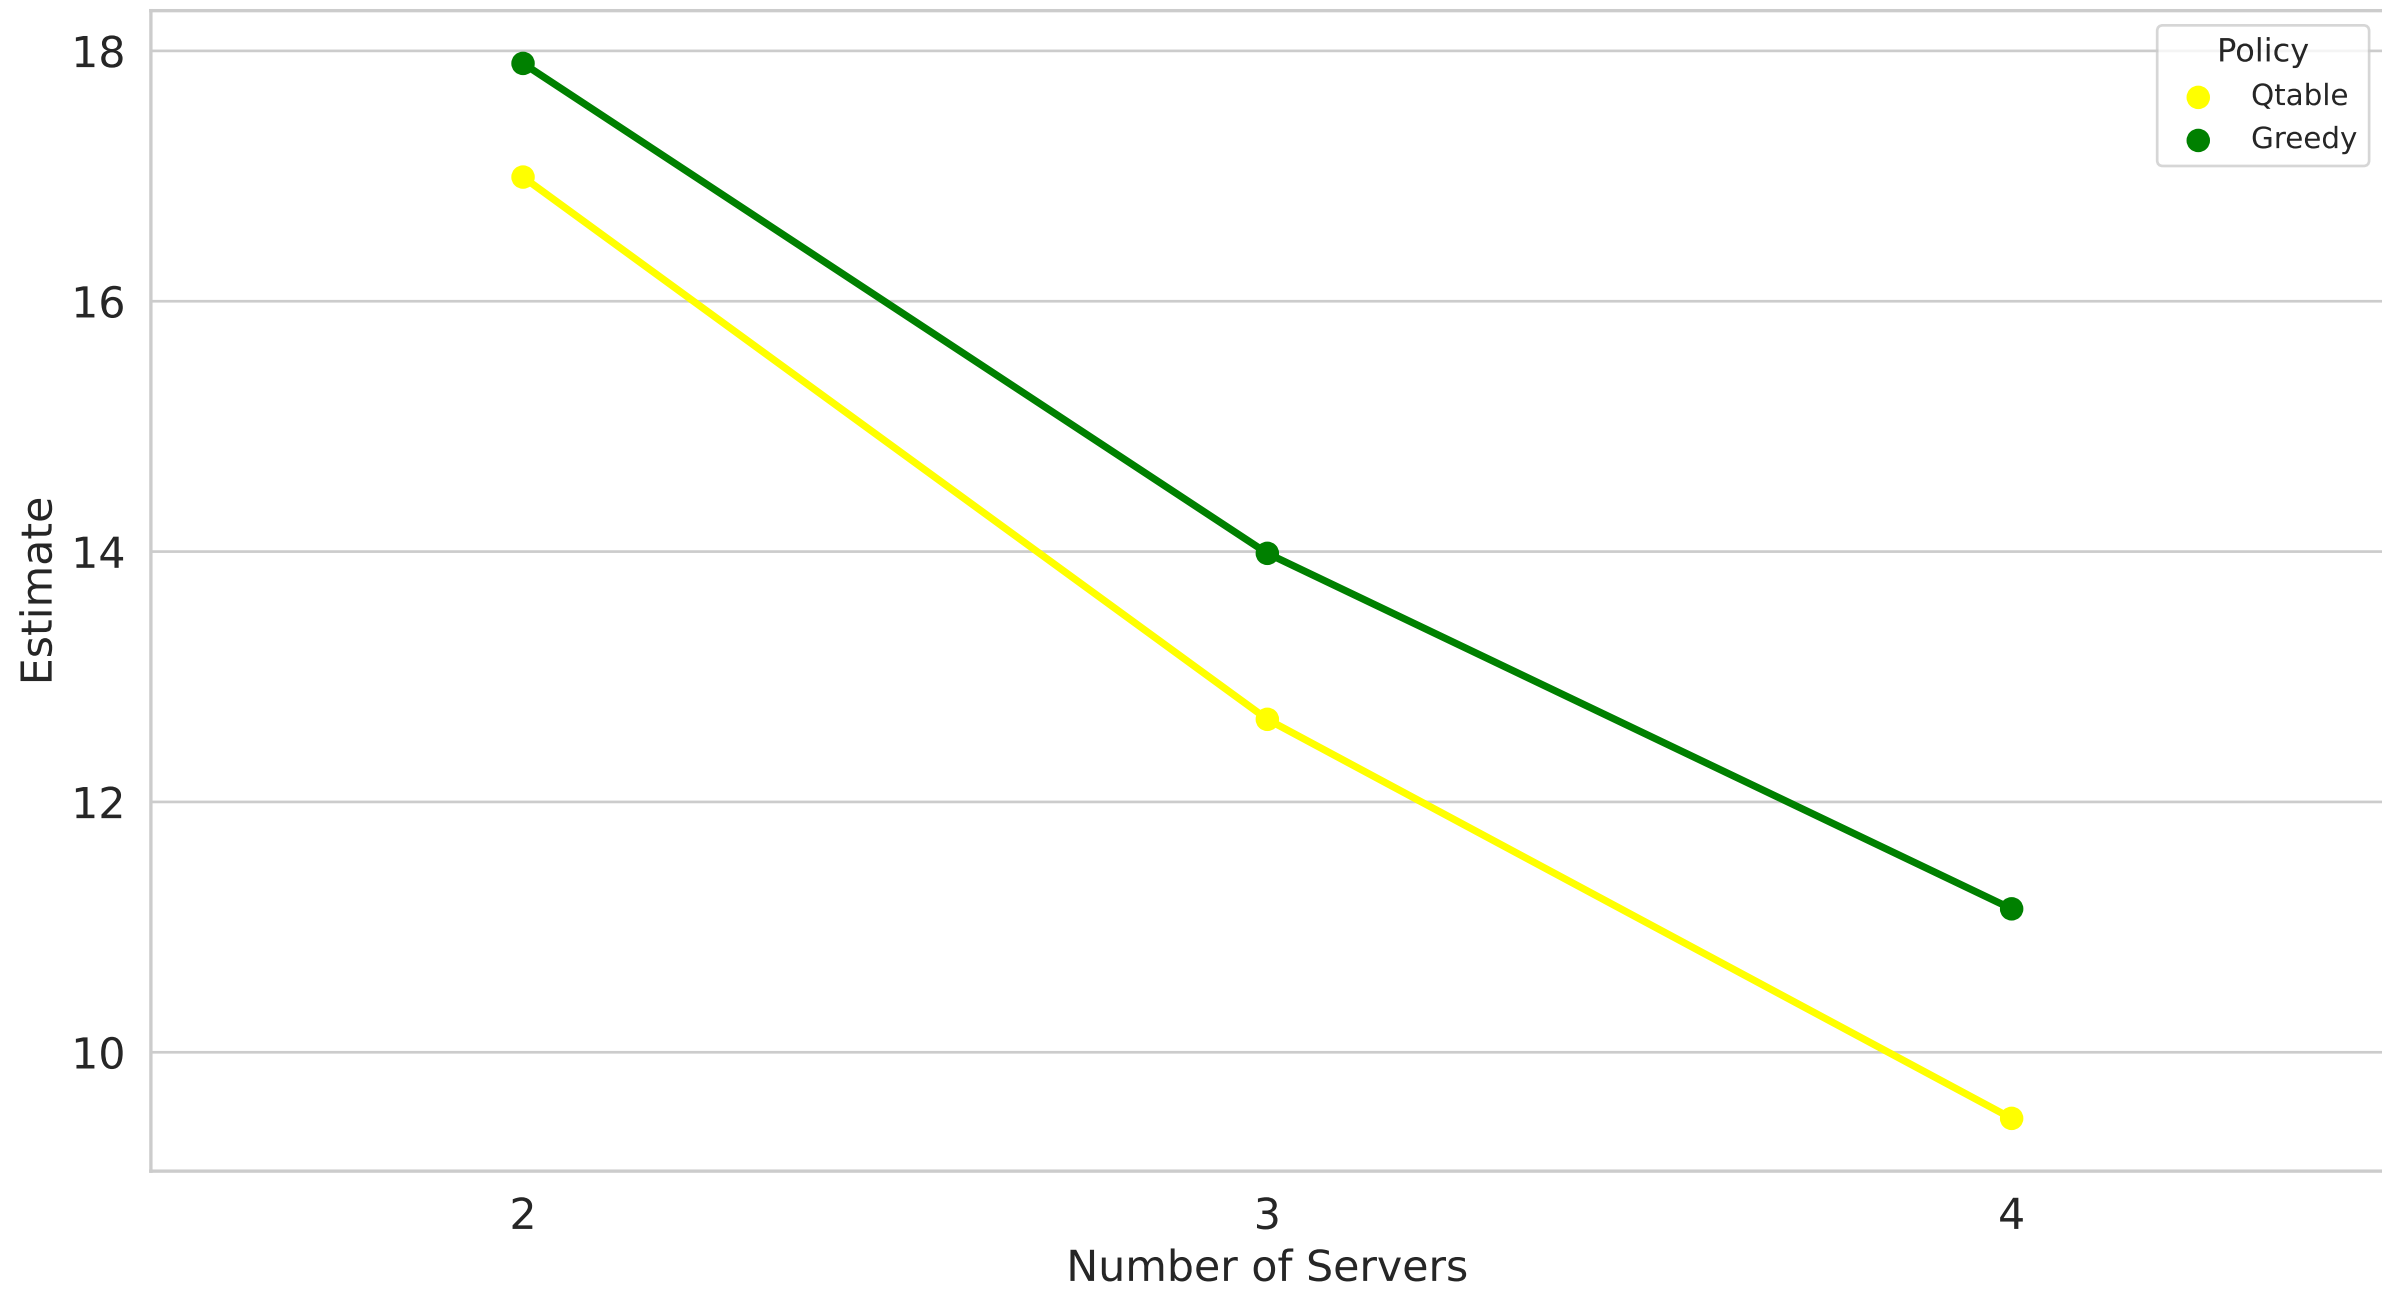

Supplement: supplementary_material [file attachment]

Training Curve for Grid with 64 Nodes

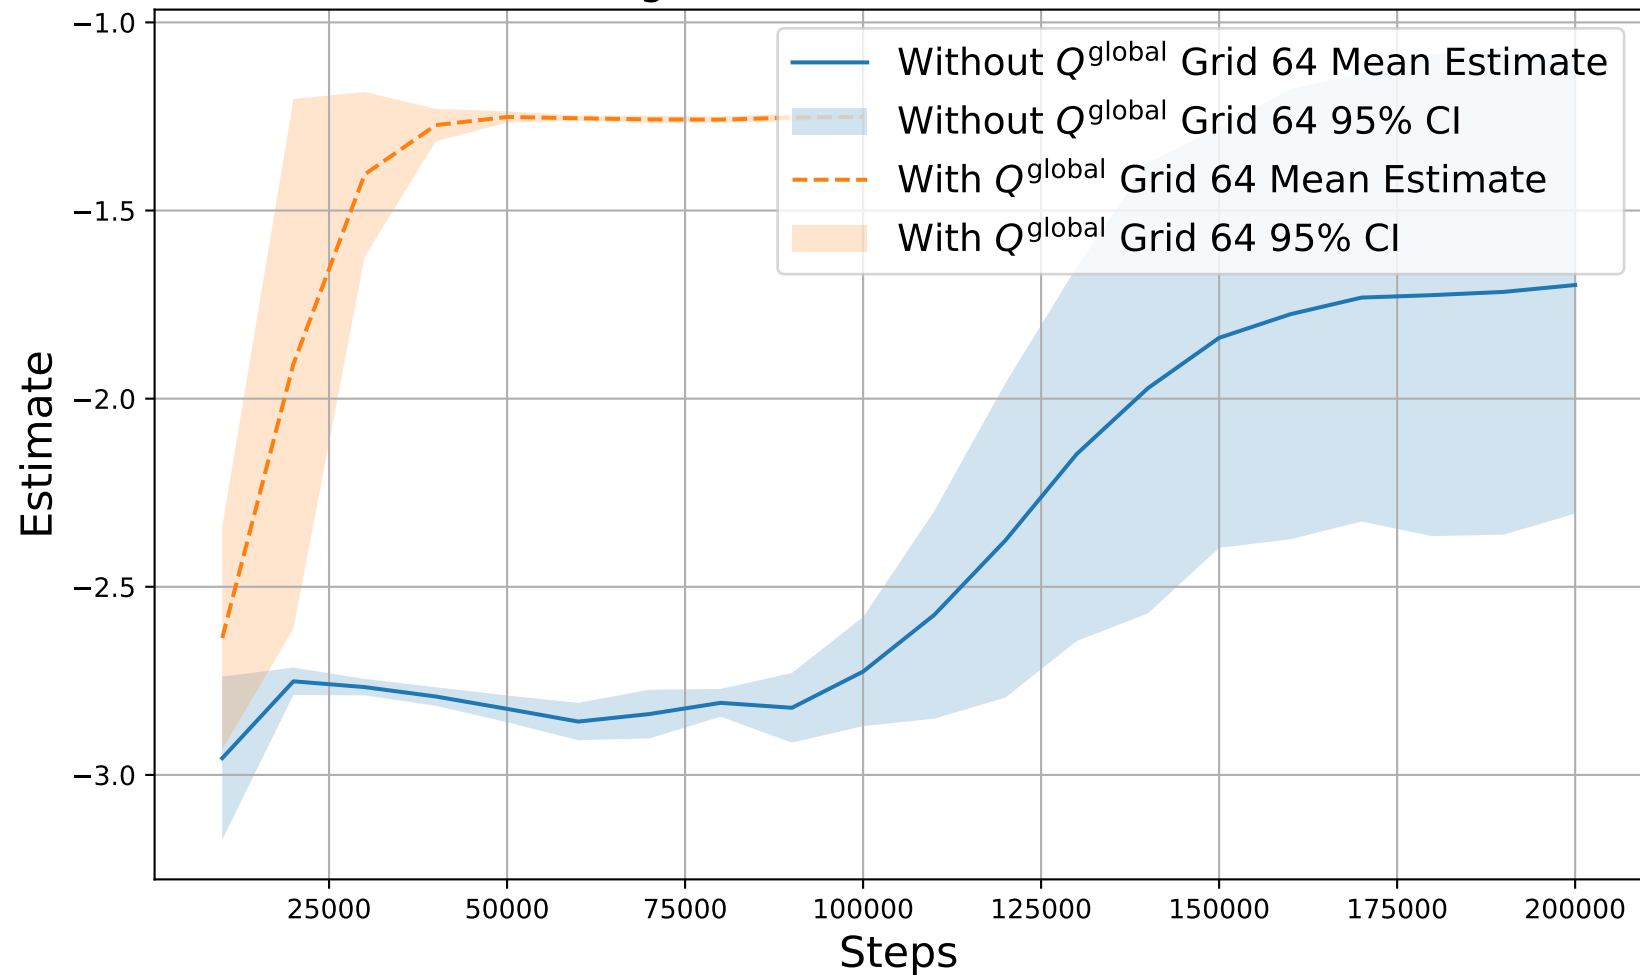

Supplement: supplementary_material [file attachment]

Tree, Number of Nodes: 9

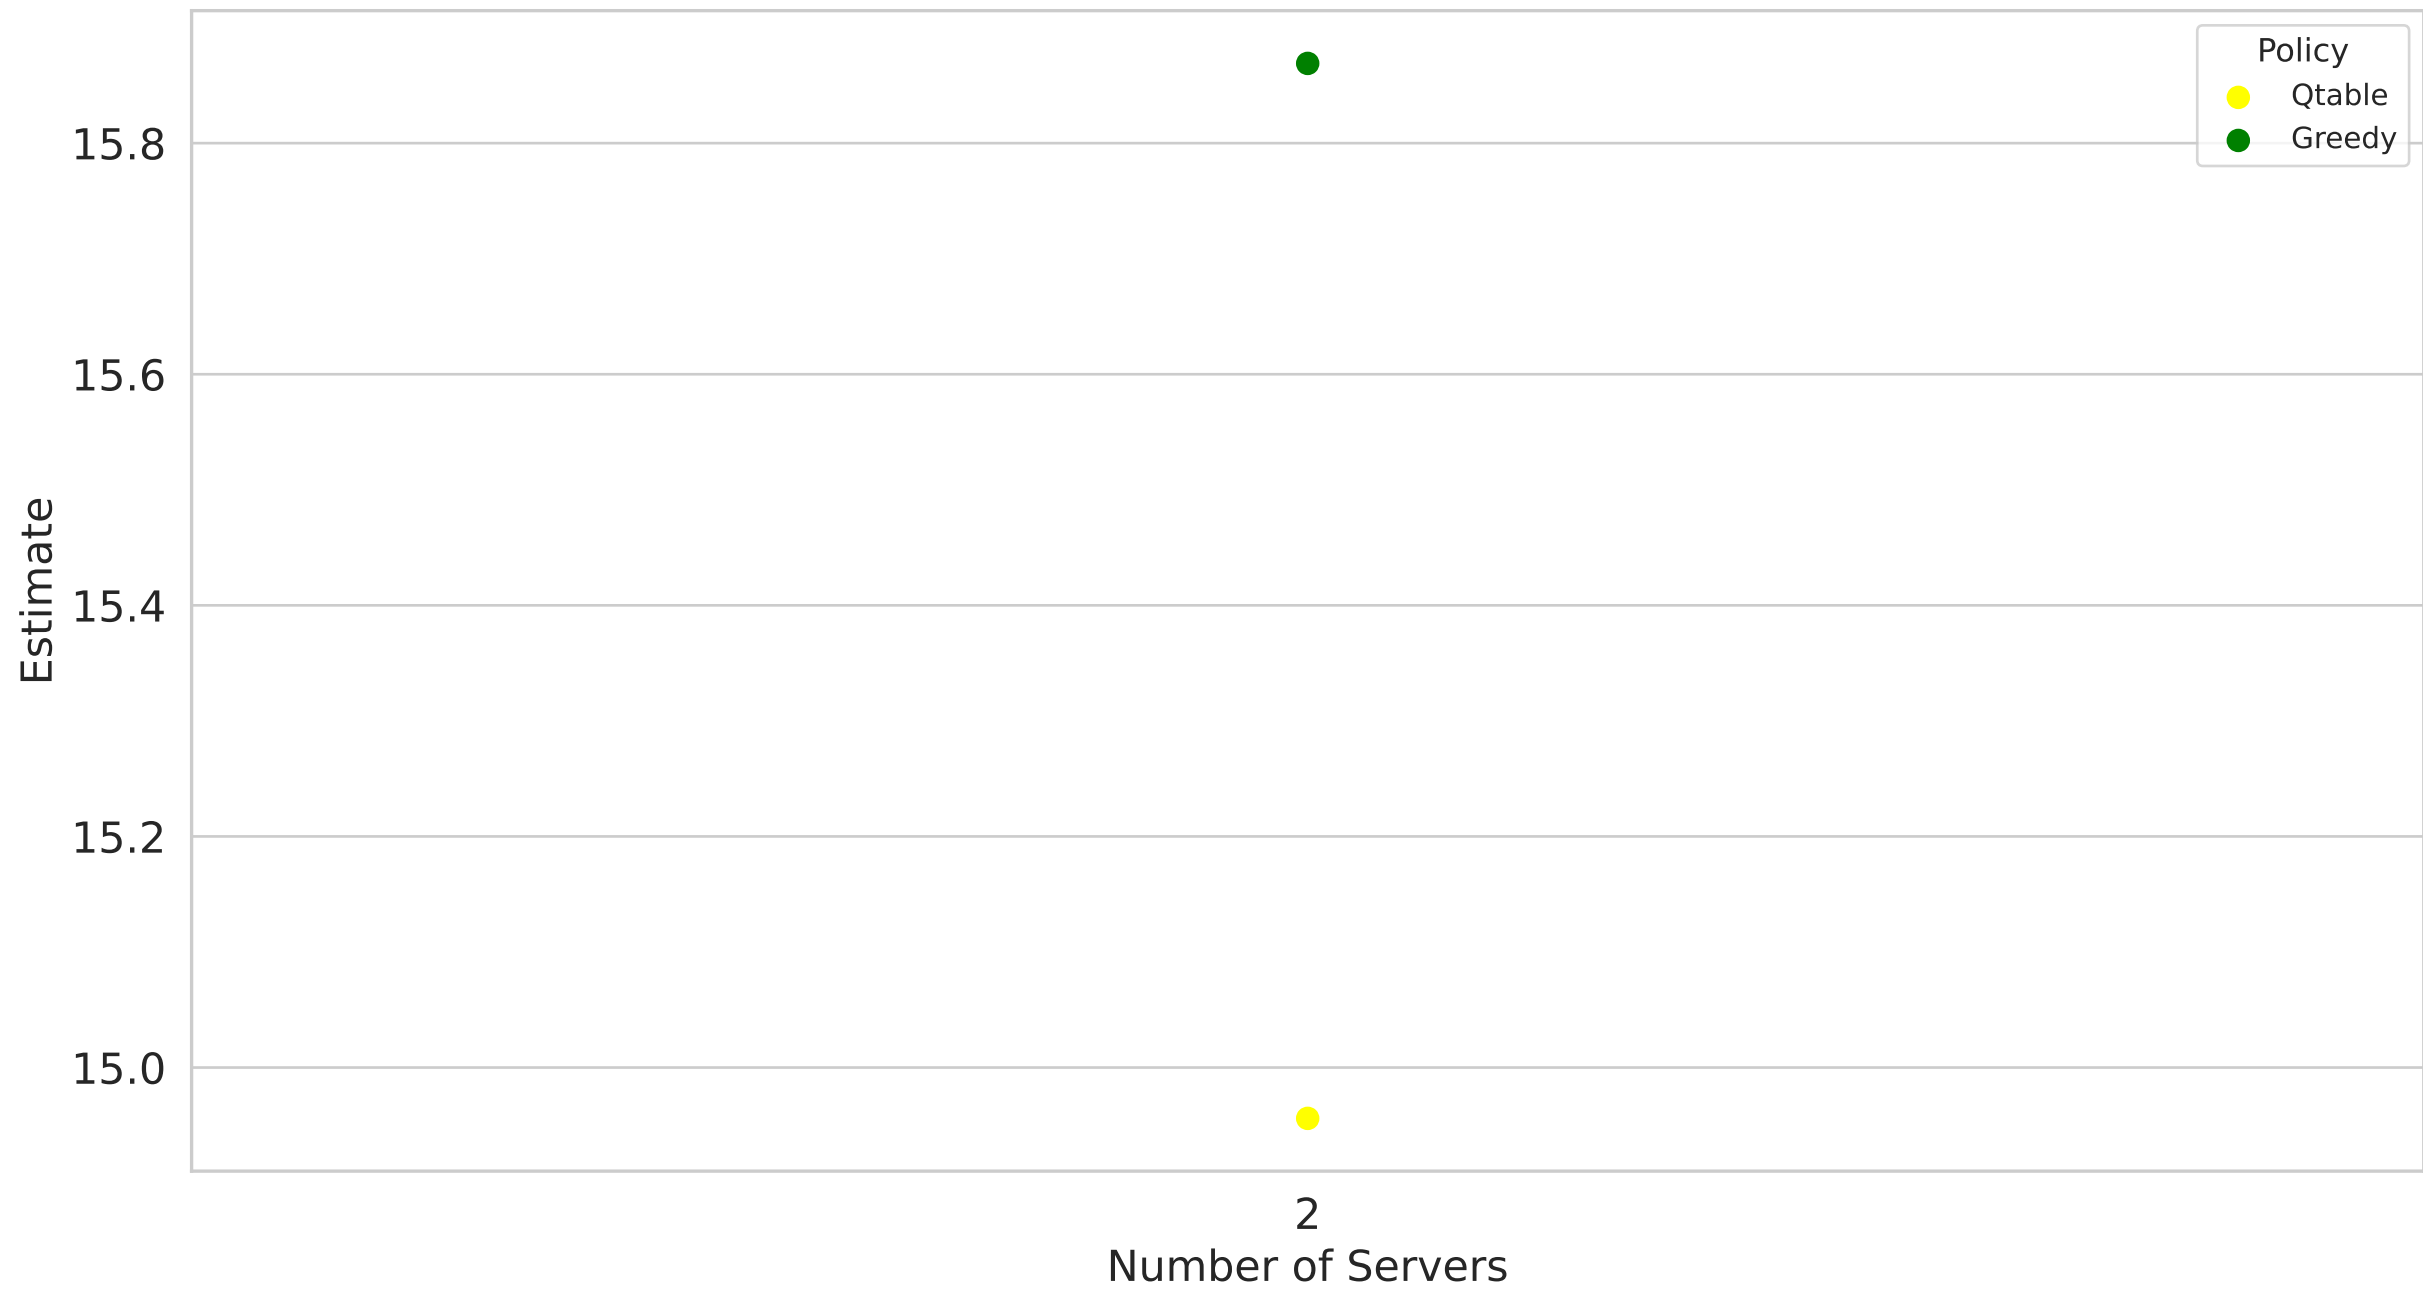

Supplement: supplementary_material [file attachment]
